# Supplementary material for: Dramatic Increase in Content of Diverse Flavonoids Accompanied with Down-Regulation of F-Box Genes in a Chrysanthemum (Chrysanthemum × morifolium (Ramat.) Hemsl.) Mutant Cultivar Producing Dark-Purple Ray Florets
Source: PubMed Central journal article supplement (PMC7464468; doi:10.3390/genes11080865), 2020-07-30
Supplement: genes-11-00865-s001.pdf [file genes-11-00865-s001.pdf]

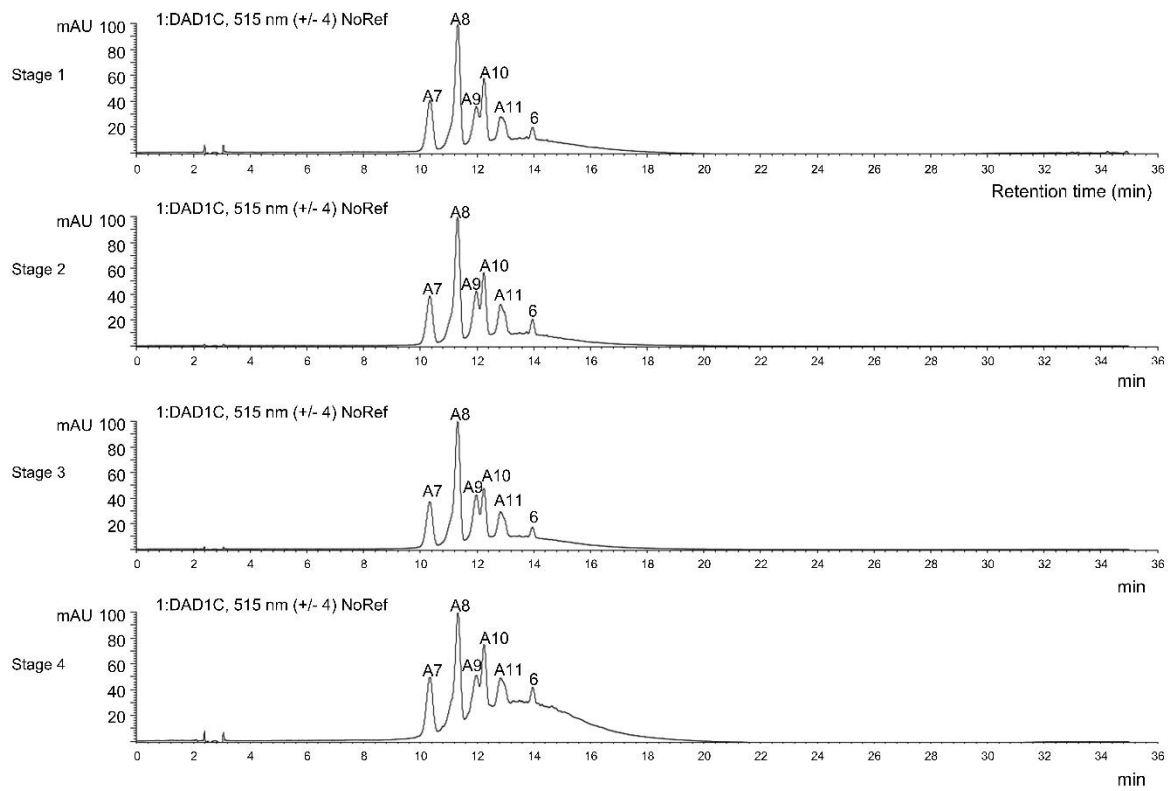

1  
2  
3  
4  
5  
6

**Supplementary Figure S1.** HPLC chromatogram (wavelength 515 nm) obtained from analysis of the ray floret corolla at four capitulum developmental stages in AD. Number above each peak correspond to that in table 1.

A

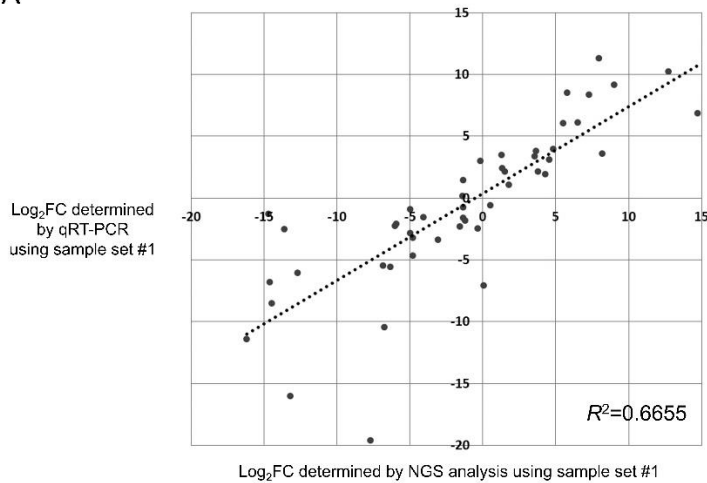

B

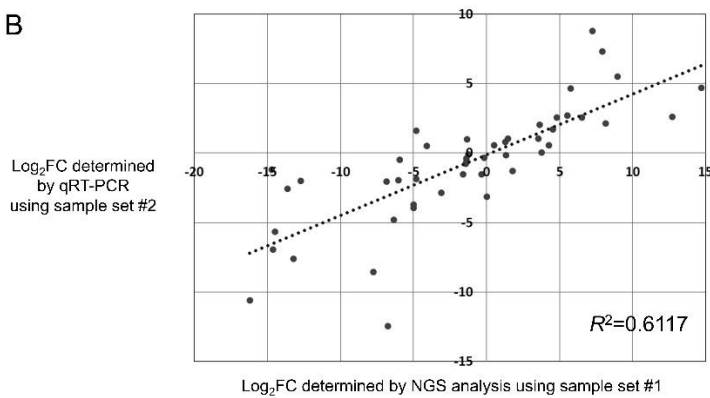

C

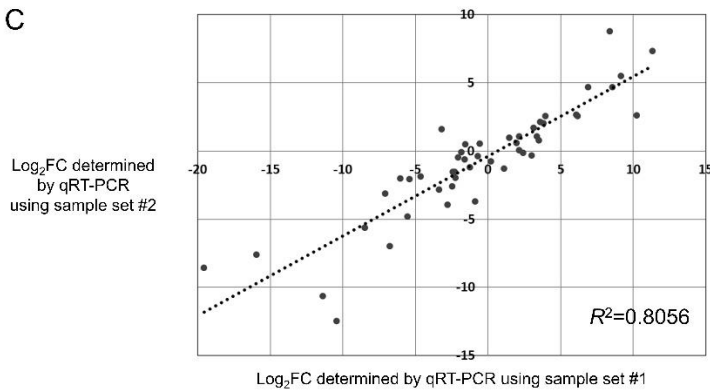

7  
8  
9  
10  
11  
12  
13  
14  
15  
16  
17

**Supplementary Figure S2.** Correlation between expression levels of unigenes determined by a transcriptomic analysis and two qRT-PCR analyses using samples obtained in two different years. This analysis was performed for 48 unigenes listed in supplementary table 2. Log<sub>2</sub>FC refers to logarithm (base 2) of the expression level of unigenes in ARTI-Dark Chocolate relative to that in Noble Wine. (A) Correlation between results of qRT-PCR and transcriptome analysis using ray florets at stage 1 of obtained in 2014 (B) Correlation between results of qRT-PCR using ray florets at stage 1 obtained in 2019 and transcriptome analysis using ray florets at stage 1 obtained in 2014 (C) Correlation between results of qRT-PCR using ray florets at stage 1 obtained in 2019 and those at stage 1 obtained in 2014, respectively.

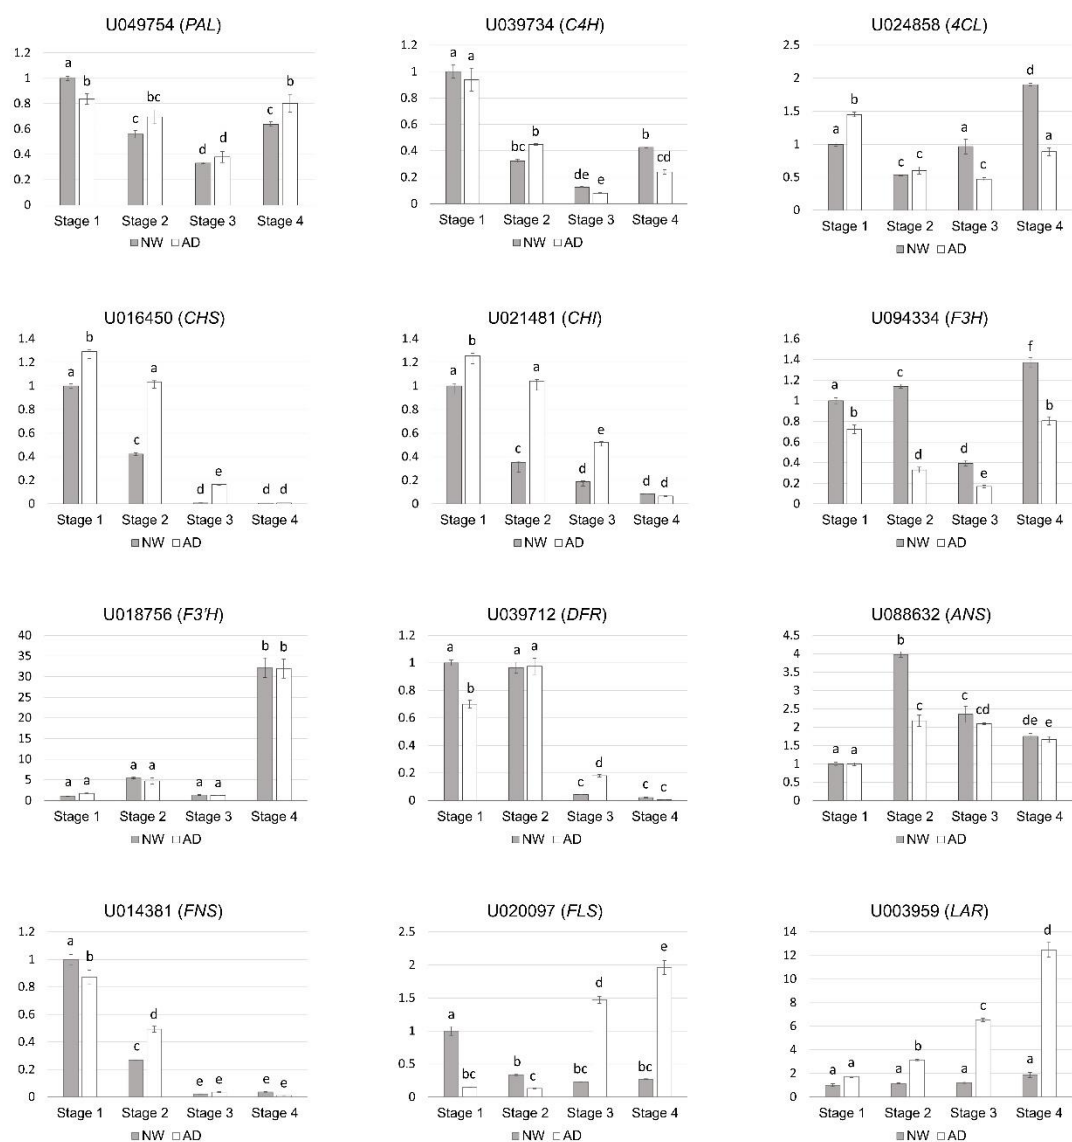

18  
19  
20  
21  
22  
23  
24  
25  
26  
27

**Supplementary Figure S3.** Expression of unigenes annotated as flavonoid biosynthetic genes at four flower stages in Noble Wine (NW) and ARTI-Dark Chocolate (AD). Relative expression levels were determined by qRT-PCR analysis. When multiple unigenes were annotated to a single flavonoid biosynthetic gene, the unigene that showed the highest expression level in AD in transcriptome analysis (Figure 4) was selected for this analysis. Error bars indicate  $\pm$ standard error (n = 3). Different letters above bars in graphs indicate statistical difference analyzed by one-way ANOVA and Duncan's multiple range test.

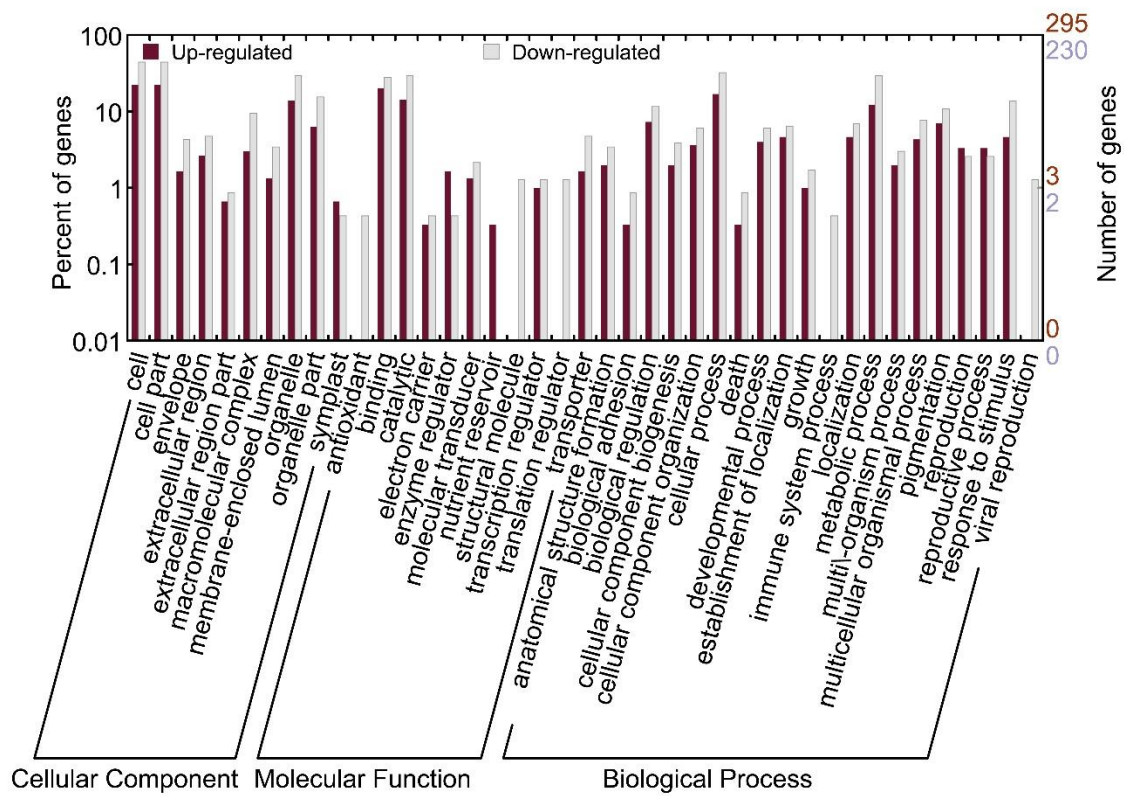

28  
29  
30  
31  
32

**Supplementary Figure S4.** Classification of differentially expressed genes (DEGs) by gene ontology (GO) analysis based on assignment of level 2 GO terms to DEGs

33 **Supplementary Table S1.** Transcriptome sequencing and unigene assembly information

| Total number of clean reads<br>(Total number of base pairs in<br>clean reads) |                               | Number of<br>unigenes | Average<br>length of<br>unigenes | N <sub>50</sub> of<br>unigenes | Total number of<br>expressed unigenes <sup>z</sup><br>(percentage to total<br>number of unigenes) |                   |
|-------------------------------------------------------------------------------|-------------------------------|-----------------------|----------------------------------|--------------------------------|---------------------------------------------------------------------------------------------------|-------------------|
| NW                                                                            | AD                            |                       |                                  |                                | NW                                                                                                | AD                |
| 53,964,812<br>(5,377,305,797)                                                 | 43,514,092<br>(4,335,046,053) | 103,470               | 567                              | 757                            | 56,966<br>(55.1%)                                                                                 | 58,467<br>(56.5%) |

34

35 <sup>z</sup> Only UniGenes having FPKM value higher than 1.0 were counted

36

37  
38  
39**Supplementary Table S2.** Comparison of expression levels of differentially expressed genes (DEGs) determined by transcriptome sequencing and qRT-PCR analysis, respectively.

| Unigene ID | Description                                                                      | Transcriptome analysis by NGS |            |                     |          | qRT-PCR             |          |                     |          |
|------------|----------------------------------------------------------------------------------|-------------------------------|------------|---------------------|----------|---------------------|----------|---------------------|----------|
|            |                                                                                  | RPKM in NW                    | RPKM in AD | Log <sub>2</sub> FC | P-value  | Sampled in 2014     |          | Sampled in 2019     |          |
|            |                                                                                  |                               |            |                     |          | Log <sub>2</sub> FC | P-value  | Log <sub>2</sub> FC | P-value  |
| U004151    | Eukaryotic peptide chain release factor subunit 1-3<br>[Source:SWISS;ACC:P35614] | 155.48                        | 0          | -16.2               | 5.91E-06 | -11.4               | 1.70E-04 | -10.61              | 5.01E-03 |
| U013224    | Probable receptor-like protein kinase At2g39360<br>[Source:SWISS;ACC:O80623]     | 51.02                         | 0          | -14.7               | 1.20E-03 | -1.25               | 6.42E-03 | -1.21               | 5.01E-03 |
| U029501    | Chalcone--flavonone isomerase<br>[Source:SWISS;ACC:Q45QI7]                       | 48.24                         | 0          | -14.6               | 2.82E-04 | -6.79               | 1.91E-02 | -6.97               | 3.09E-03 |
| U032284    | Glutathione S-transferase DHAR2<br>[Source:SWISS;ACC:Q9FRL8]                     | 23.72                         | 0          | -14.5               | 9.72E-04 | -8.5                | 8.36E-04 | -5.64               | 1.42E-04 |
| U014436    | Cyclin-A2-1<br>[Source:SWISS;ACC:Q39071]                                         | 11.52                         | 0          | -13.6               | 1.29E-03 | -2.48               | 4.89E-03 | -2.57               | 2.27E-03 |
| U016843    | -                                                                                | 20.62                         | 0          | -13.2               | 5.87E-03 | -15.98              | 1.73E-02 | -7.61               | 4.41E-04 |
| U011315    | Leucoanthocyanidin dioxygenase<br>[Source:SWISS;ACC:Q96323]                      | 35.31                         | 0          | -12.7               | 7.34E-02 | -6.03               | 3.63E-04 | -2.02               | 3.60E-05 |
| U011807    | Histone deacetylase 14<br>[Source:SWISS;ACC:Q941D6]                              | 29.35                         | 0.09       | -7.73               | 1.33E-03 | -19.57              | 3.68E-04 | -8.58               | 7.56E-03 |
| U036450    | Malonyl-coenzyme A:anthocyanin 3-O-glucoside-6"-O-malonyltransferase             | 41.36                         | 0.23       | -6.86               | 1.05E-03 | -5.43               | 7.77E-04 | -2.05               | 7.04E-05 |

| Unigene ID | Description                                                                   | Transcriptome analysis by NGS |            |                     |          | qRT-PCR             |          |                     |          |
|------------|-------------------------------------------------------------------------------|-------------------------------|------------|---------------------|----------|---------------------|----------|---------------------|----------|
|            |                                                                               | RPKM in NW                    | RPKM in AD | Log <sub>2</sub> FC | P-value  | Sampled in 2014     |          | Sampled in 2019     |          |
|            |                                                                               |                               |            |                     |          | Log <sub>2</sub> FC | P-value  | Log <sub>2</sub> FC | P-value  |
|            | {ECO:0000303 PubMed:12481098 } [Source:SWISS;ACC:Q8GSN8]                      |                               |            |                     |          |                     |          |                     |          |
| U061875    | Secoisolariciresinol dehydrogenase [Source:SWISS;ACC:Q94KL8]                  | 238.94                        | 1.45       | -6.77               | 1.59E-04 | -10.44              | 5.97E-05 | -12.46              | 1.26E-03 |
| U061943    | Acid phosphatase 1 [Source:SWISS;ACC:P27061]                                  | 501.33                        | 4.11       | -6.35               | 3.89E-04 | -5.55               | 4.09E-03 | -4.82               | 1.61E-05 |
| U000039    | 3-ketoacyl-CoA synthase 17 [Source:SWISS;ACC:Q5XEP9]                          | 60.37                         | 0.61       | -6.01               | 1.75E-03 | -2.24               | 1.14E-02 | -1.94               | 2.18E-05 |
| U015711    | Basic blue protein [Source:SWISS;ACC:P00303]                                  | 140.33                        | 1.59       | -5.95               | 9.29E-03 | -2.05               | 2.45E-02 | -0.49               | 1.41E-02 |
| U020751    | Flavonoid 3'-monooxygenase [Source:SWISS;ACC:Q9SBQ9]                          | 132.27                        | 2.64       | -5.01               | 4.53E-03 | -2.8                | 3.71E-03 | -3.94               | 2.31E-04 |
| U020721    | ABC transporter G family member 39 [Source:SWISS;ACC:Q7PC84]                  | 23.68                         | 0.48       | -4.98               | 9.79E-03 | -0.87               | 2.61E-02 | -3.7                | 2.06E-07 |
| U043123    | Protein TRANSPARENT TESTA 12 [Source:SWISS;ACC:Q9LYT3]                        | 7.37                          | 0.17       | -4.8                | 4.29E-02 | -3.18               | 1.82E-02 | 1.6                 | 1.11E-04 |
| U020331    | UDP-glycosyltransferase 76C1 [Source:SWISS;ACC:Q9FI99]                        | 173.53                        | 4.04       | -4.79               | 3.24E-03 | -4.63               | 5.46E-04 | -1.87               | 1.03E-03 |
| U029358    | 1-aminocyclopropane-1-carboxylate oxidase homolog 1 [Source:SWISS;ACC:Q84MB3] | 207.11                        | 8.96       | -4.07               | 4.47E-02 | -1.56               | 1.15E-02 | 0.5                 | 1.17E-02 |
| U020097    | Flavonol synthase/flavanone 3-hydroxylase [Source:SWISS;ACC:Q9M547]           | 218.25                        | 16.59      | -3.1                | 1.72E-02 | -3.38               | 4.37E-03 | -2.85               | 2.16E-03 |

| Unigene ID | Description                                                          | Transcriptome analysis by NGS |            |                     |          | qRT-PCR             |          |                     |          |
|------------|----------------------------------------------------------------------|-------------------------------|------------|---------------------|----------|---------------------|----------|---------------------|----------|
|            |                                                                      | RPKM in NW                    | RPKM in AD | Log <sub>2</sub> FC | P-value  | Sampled in 2014     |          | Sampled in 2019     |          |
|            |                                                                      |                               |            |                     |          | Log <sub>2</sub> FC | P-value  | Log <sub>2</sub> FC | P-value  |
| U016976    | Chalcone synthase 3<br>[Source:SWISS;ACC:P48392]                     | 889.03                        | 200.47     | -1.58               | 5.43E-01 | -2.29               | 2.08E-03 | -1.54               | 1.79E-03 |
| U025458    | Cytochrome P450 98A2<br>[Source:SWISS;ACC:O48922]                    | 121.08                        | 29.66      | -1.4                | 4.48E-01 | 0.2                 | 5.23E-01 | -0.77               | 1.19E-03 |
| U027769    | Anthocyanidin 5,3-O-glucosyltransferase<br>[Source:SWISS;ACC:Q4R1I9] | 1552.95                       | 386.97     | -1.37               | 5.44E-01 | -0.72               | 4.20E-02 | -0.39               | 2.75E-02 |
| U039712    | Dihydroflavonol-4-reductase<br>[Source:SWISS;ACC:P51102]             | 1859.72                       | 475.47     | -1.36               | 5.46E-01 | -1.6                | 2.13E-03 | -0.61               | 6.68E-03 |
| U019144    | Probable protein Pop3<br>[Source:SWISS;ACC:Q9LUV2]                   | 158.99                        | 45.28      | -1.35               | 3.58E-01 | 1.44                | 9.60E-04 | 0.97                | 8.12E-03 |
| U050684    | V-type proton ATPase subunit H<br>[Source:SWISS;ACC:Q9LX65]          | 217.46                        | 60.87      | -1.23               | 4.46E-01 | -1.83               | 9.56E-05 | -0.1                | 1.40E-01 |
| U023884    | Ras-related protein RHN1<br>[Source:SWISS;ACC:P31583]                | 167.57                        | 86.77      | -0.359              | 9.42E-01 | -2.44               | 1.16E-03 | -1.51               | 1.38E-05 |
| U018755    | Flavonoid 3'-monooxygenase<br>[Source:SWISS;ACC:Q9SBQ9]              | 454.79                        | 263.35     | -0.163              | 5.62E-01 | 2.99                | 1.14E-02 | -0.35               | 4.49E-02 |
| U017796    | Gibberellin-regulated protein 10<br>[Source:SWISS;ACC:Q8LFM2]        | 65.77                         | 47.98      | 0.0358              | 9.40E-01 | -7.07               | 2.32E-04 | -3.14               | 2.85E-03 |
| U021481    | Chalcone--flavonone isomerase 2<br>[Source:SWISS;ACC:A1E261]         | 636.72                        | 601.17     | 0.506               | 6.24E-01 | -0.59               | 1.43E-01 | 0.56                | 4.18E-02 |
| U003959    | Leucoanthocyanidin dioxygenase<br>[Source:SWISS;ACC:Q96323]          | 1.62                          | 2.73       | 1.28                | 5.94E-01 | 3.49                | 2.79E-03 | 0.8                 | 1.89E-02 |



| Unigene ID | Description                                                                    | Transcriptome analysis by NGS |            |                     |          | qRT-PCR             |          |                     |          |
|------------|--------------------------------------------------------------------------------|-------------------------------|------------|---------------------|----------|---------------------|----------|---------------------|----------|
|            |                                                                                | RPKM in NW                    | RPKM in AD | Log <sub>2</sub> FC | P-value  | Sampled in 2014     |          | Sampled in 2019     |          |
|            |                                                                                |                               |            |                     |          | Log <sub>2</sub> FC | P-value  | Log <sub>2</sub> FC | P-value  |
| U027507    | Shikimate O-hydroxycinnamoyltransferase [Source:SWISS;ACC:Q8GSM7]              | 41.95                         | 69.05      | 1.34                | 2.52E-01 | 2.42                | 1.07E-02 | -0.13               | 5.95E-01 |
| U041557    | Anthocyanidin 5,3-O-glucosyltransferase [Source:SWISS;ACC:Q4R1I9]              | 6.87                          | 12.51      | 1.49                | 2.47E-01 | 2.14                | 5.50E-05 | 1.06                | 3.76E-03 |
| U043359    | Shikimate O-hydroxycinnamoyltransferase [Source:SWISS;ACC:Q8GSM7]              | 5.48                          | 13.24      | 1.77                | 6.46E-01 | 1.11                | 4.21E-03 | -1.29               | 7.27E-02 |
| U013121    | Lipid transfer protein EARLI 1 [Source:SWISS;ACC:Q39176]                       | 75.94                         | 626.79     | 3.57                | 2.20E-02 | 3.38                | 4.03E-02 | 1.06                | 2.64E-02 |
| U020473    | Aquaporin TIP1-1 [Source:SWISS;ACC:P25818]                                     | 15.56                         | 127.76     | 3.62                | 3.65E-03 | 3.83                | 1.19E-03 | 2.03                | 3.86E-03 |
| U043902    | Anthocyanidin 3-O-glucosyltransferase 2 [Source:SWISS;ACC:Q40285]              | 0.48                          | 4.63       | 3.79                | 6.52E-01 | 2.16                | 9.17E-02 | 0.05                | 6.06E-01 |
| U016560    | Defensin-like protein {ECO:0000250 UniProtKB:Q09198} [Source:SWISS;ACC:B5LZ79] | 24.21                         | 323.44     | 4.26                | 1.11E-02 | 1.96                | 1.36E-02 | 0.57                | 5.35E-02 |
| U033935    | Uncharacterized protein YnbD [Source:SWISS;ACC:P76093]                         | 2.5                           | 40.54      | 4.55                | 3.14E-02 | 3.15                | 3.79E-05 | 1.71                | 6.78E-03 |
| U033988    | Cytochrome P450 86B1 [Source:SWISS;ACC:Q9FMY1]                                 | 1.71                          | 30.85      | 4.8                 | 1.34E-04 | 3.96                | 1.47E-04 | 2.58                | 9.08E-04 |

| Unigene ID | Description                                                                           | Transcriptome analysis by NGS |            |                     |          | qRT-PCR             |          |                     |          |
|------------|---------------------------------------------------------------------------------------|-------------------------------|------------|---------------------|----------|---------------------|----------|---------------------|----------|
|            |                                                                                       | RPKM in NW                    | RPKM in AD | Log <sub>2</sub> FC | P-value  | Sampled in 2014     |          | Sampled in 2019     |          |
|            |                                                                                       |                               |            |                     |          | Log <sub>2</sub> FC | P-value  | Log <sub>2</sub> FC | P-value  |
| U024030    | Copper transporter 6<br>[Source:SWISS;ACC:Q8GWP3]                                     | 3.3                           | 104.57     | 5.52                | 1.29E-03 | 6.06                | 1.12E-05 | 2.68                | 4.24E-03 |
| U014148    | Probable aquaporin NIP-type<br>[Source:SWISS;ACC:P49173]                              | 0.82                          | 31.55      | 5.76                | 1.30E-02 | 8.55                | 8.60E-05 | 4.66                | 8.94E-04 |
| U020146    | Copper transporter 5<br>[Source:SWISS;ACC:Q93VM8]                                     | 27.07                         | 1769.93    | 6.51                | 1.41E-04 | 6.15                | 7.49E-05 | 2.54                | 7.84E-03 |
| U026215    | Caffeic acid 3-O-methyltransferase<br>[Source:SWISS;ACC:P28002]                       | 0.19                          | 19.63      | 7.27                | 4.68E-03 | 8.39                | 3.49E-03 | 8.79                | 4.56E-03 |
| U019322    | Probable non-specific lipid-transfer protein AKCS9<br>[Source:SWISS;ACC:Q43681]       | 9.72                          | 1705.88    | 7.94                | 3.13E-07 | 11.33               | 1.21E-02 | 7.32                | 4.26E-03 |
| U031040    | Protein TIFY 10A<br>[Source:SWISS;ACC:Q9LMA8]                                         | 0.4                           | 78.62      | 8.17                | 1.39E-04 | 3.59                | 3.53E-05 | 2.14                | 3.76E-05 |
| U002745    | Agglutinin<br>[Source:SWISS;ACC:P82859]                                               | 2.51                          | 860.89     | 8.98                | 5.05E-05 | 9.16                | 1.27E-02 | 5.52                | 1.24E-03 |
| U000899    | 1-deoxy-D-xylulose-5-phosphate synthase 1, chloroplastic<br>[Source:SWISS;ACC:O22567] | 0                             | 11.63      | 12.7                | 5.61E-02 | 10.26               | 1.50E-02 | 2.62                | 8.65E-03 |
| U015169    | Fatty-acid-binding protein 1<br>[Source:SWISS;ACC:Q9M1X2]                             | 0                             | 35.3       | 14.7                | 1.10E-03 | 6.88                | 9.19E-03 | 4.69                | 3.48E-04 |

40

41

42

43 **Supplementary Table S3.** Expression levels of differentially expressed genes.

| Unigene ID | Length | Description                                                                         | FPKM   |    | Log <sub>2</sub> FC | P-value  | Gene ontology                                                                                                                               |
|------------|--------|-------------------------------------------------------------------------------------|--------|----|---------------------|----------|---------------------------------------------------------------------------------------------------------------------------------------------|
|            |        |                                                                                     | NW     | AD |                     |          |                                                                                                                                             |
| U050360    | 1,273  | -                                                                                   | 253.62 | 0  | -17.4               | 1.87E-07 | -                                                                                                                                           |
| U059230    | 1,413  | -                                                                                   | 186.56 | 0  | -17.1               | 3.13E-07 | -                                                                                                                                           |
| U089491    | 2,172  | -                                                                                   | 95.77  | 0  | -16.9               | 5.17E-07 | -                                                                                                                                           |
| U032395    | 1,903  | Probable protein S-acyltransferase 7<br>[Source:SWISS;ACC:Q0WQK2]                   | 98.3   | 0  | -16.7               | 8.01E-07 | GO:0005886, GO:0008270, GO:0016021,<br>GO:0019706                                                                                           |
| U020637    | 3,121  | -                                                                                   | 51.41  | 0  | -16.6               | 1.10E-06 | -                                                                                                                                           |
| U004151    | 1,023  | Eukaryotic peptide chain release factor<br>subunit 1-3<br>[Source:SWISS;ACC:P35614] | 155.48 | 0  | -16.2               | 2.64E-06 | GO:0003747, GO:0005737, GO:0006415,<br>GO:0016149                                                                                           |
| U052925    | 3,722  | Elongation factor 2<br>[Source:SWISS;ACC:O23755]                                    | 33.2   | 0  | -16.2               | 2.79E-06 | GO:0003746, GO:0003924, GO:0005525,<br>GO:0005737                                                                                           |
| U054922    | 2,803  | Probable pectin methyltransferase<br>QUA2 [Source:SWISS;ACC:Q9C9Q8]                 | 43.05  | 0  | -16.1               | 3.40E-06 | GO:0000139, GO:0005768, GO:0005794,<br>GO:0005802, GO:0007155, GO:0008168,<br>GO:0009735, GO:0010289, GO:0016021,<br>GO:0048364, GO:0048367 |
| U064359    | 783    | -                                                                                   | 191.83 | 0  | -16                 | 5.33E-06 | -                                                                                                                                           |

| Unigene ID | Length | Description                                                                                                | FPKM   |    | Log <sub>2</sub> FC | P-value  | Gene ontology                                                                                                                                              |
|------------|--------|------------------------------------------------------------------------------------------------------------|--------|----|---------------------|----------|------------------------------------------------------------------------------------------------------------------------------------------------------------|
|            |        |                                                                                                            | NW     | AD |                     |          |                                                                                                                                                            |
| U033430    | 1,730  | -                                                                                                          | 58.03  | 0  | -15.8               | 9.39E-06 | -                                                                                                                                                          |
| U036203    | 1,168  | -                                                                                                          | 94.66  | 0  | -15.8               | 9.34E-06 | -                                                                                                                                                          |
| U026643    | 2,236  | Putative pentatricopeptide repeat-containing protein At1g12700, mitochondrial<br>[Source:SWISS;ACC:P0C7Q7] | 41.88  | 0  | -15.7               | 1.05E-05 | GO:0005739                                                                                                                                                 |
| U033957    | 1,075  | Peptidyl-prolyl cis-trans isomerase CYP20-2, chloroplastic<br>[Source:SWISS;ACC:Q9ASS6]                    | 97.79  | 0  | -15.7               | 1.29E-05 | GO:0003755, GO:0006457, GO:0009507, GO:0009533, GO:0009534, GO:0009535, GO:0009543, GO:0009579, GO:0010275, GO:0031969, GO:0031977, GO:0042277, GO:0043424 |
| U044466    | 1,649  | UDP-galactose transporter 2<br>[Source:SWISS;ACC:Q9SRE4]                                                   | 57.84  | 0  | -15.7               | 1.20E-05 | GO:0005457, GO:0005459, GO:0005460, GO:0009624, GO:0015783, GO:0015786, GO:0016021, GO:0072334                                                             |
| U054924    | 2,793  | Probable pectin methyltransferase QUA2 [Source:SWISS;ACC:Q9C9Q8]                                           | 30.29  | 0  | -15.6               | 1.41E-05 | GO:0000139, GO:0005768, GO:0005794, GO:0005802, GO:0007155, GO:0008168, GO:0009735, GO:0010289, GO:0016021, GO:0048364, GO:0048367                         |
| U100261    | 1,051  | -                                                                                                          | 94.76  | 0  | -15.6               | 1.65E-05 | -                                                                                                                                                          |
| U014898    | 2,669  | Dammarenediol II synthase<br>[Source:SWISS;ACC:Q08IT1]                                                     | 26.96  | 0  | -15.4               | 2.79E-05 | GO:0016021, GO:0016829, GO:0016866                                                                                                                         |
| U033823    | 636    | Ubiquitin-60S ribosomal protein L40<br>[Source:SWISS;ACC:P51423]                                           | 175.36 | 0  | -15.4               | 3.09E-05 | GO:0003735, GO:0005634, GO:0005840, GO:0006412                                                                                                             |

| Unigene ID | Length | Description                                                                               | FPKM   |    | Log <sub>2</sub> FC | P-value  | Gene ontology                                                                                              |
|------------|--------|-------------------------------------------------------------------------------------------|--------|----|---------------------|----------|------------------------------------------------------------------------------------------------------------|
|            |        |                                                                                           | NW     | AD |                     |          |                                                                                                            |
| U048120    | 870    | Histone H2AX<br>[Source:SWISS;ACC:P35063]                                                 | 109.92 | 0  | -15.4               | 2.68E-05 | GO:0000786, GO:0003677, GO:0005634                                                                         |
| U030774    | 501    | Pentatricopeptide repeat-containing protein At2g25580<br>[Source:SWISS;ACC:Q680H3]        | 262.5  | 0  | -15.3               | 4.09E-05 | -                                                                                                          |
| U091402    | 1,993  | -                                                                                         | 36.08  | 0  | -15.3               | 3.30E-05 | -                                                                                                          |
| U020594    | 1,529  | -                                                                                         | 44.2   | 0  | -15.2               | 5.23E-05 | -                                                                                                          |
| U021588    | 2,430  | Exocyst complex component EXO70A1<br>[Source:SWISS;ACC:Q9LZD3]                            | 26.04  | 0  | -15.2               | 4.95E-05 | GO:0000145, GO:0005576, GO:0005618, GO:0005829, GO:0005856, GO:0005886, GO:0006887, GO:0009524             |
| U031677    | 2,132  | (+)-larreatricin hydroxylase, chloroplastic<br>[Source:SWISS;ACC:Q6UIL3]                  | 30.99  | 0  | -15.2               | 4.48E-05 | GO:0004097, GO:0009543, GO:0046148, GO:0046872, GO:1901708, GO:1901709                                     |
| U055255    | 867    | Pleiotropic drug resistance protein 2<br>[Source:SWISS;ACC:Q2PCF1]                        | 94.08  | 0  | -15.2               | 5.16E-05 | GO:0005524, GO:0006810, GO:0016021, GO:0016887                                                             |
| U017481    | 1,575  | Enoyl-[acyl-carrier-protein] reductase [NADH], chloroplastic<br>[Source:SWISS;ACC:Q9SLA8] | 39.73  | 0  | -15.1               | 6.93E-05 | GO:0004318, GO:0005507, GO:0005835, GO:0006633, GO:0009507, GO:0009570, GO:0009579, GO:0009941, GO:0016631 |
| U024689    | 1,773  | Protein notum homolog<br>[Source:SWISS;ACC:Q8R116]                                        | 34.36  | 0  | -15.1               | 7.03E-05 | GO:0005576, GO:0016787                                                                                     |

| Unigene ID | Length | Description                                                                                    | FPKM  |    | Log <sub>2</sub> FC | P-value  | Gene ontology                                                                                                                                                          |
|------------|--------|------------------------------------------------------------------------------------------------|-------|----|---------------------|----------|------------------------------------------------------------------------------------------------------------------------------------------------------------------------|
|            |        |                                                                                                | NW    | AD |                     |          |                                                                                                                                                                        |
| U030016    | 1,731  | UPF0481 protein At3g47200<br>[Source:SWISS;ACC:Q9SD53]                                         | 37.45 | 0  | -15.1               | 5.56E-05 | GO:0005886, GO:0016021                                                                                                                                                 |
| U025777    | 928    | -                                                                                              | 74.23 | 0  | -15                 | 9.08E-05 | -                                                                                                                                                                      |
| U036301    | 1,313  | 50S ribosomal protein L22<br>{ECO:0000255}HAMAP-<br>Rule:MF_01331<br>[Source:SWISS;ACC:A6U864] | 47.11 | 0  | -15                 | 8.67E-05 | GO:0003735, GO:0006412, GO:0015934,<br>GO:0019843                                                                                                                      |
| U036204    | 831    | -                                                                                              | 83.88 | 0  | -14.9               | 1.06E-04 | -                                                                                                                                                                      |
| U042866    | 1,401  | -                                                                                              | 41.83 | 0  | -14.9               | 1.01E-04 | -                                                                                                                                                                      |
| U050920    | 1,891  | NEDD8-activating enzyme E1<br>regulatory subunit {ECO:0000305}<br>[Source:SWISS;ACC:P42744]    | 27.49 | 0  | -14.8               | 1.27E-04 | GO:0000166, GO:0003824, GO:0005634,<br>GO:0005829, GO:0006281, GO:0007131,<br>GO:0009414, GO:0009734, GO:0009735,<br>GO:0009965, GO:0010252, GO:0016567,<br>GO:0045116 |
| U051061    | 2,344  | KH domain-containing protein<br>At4g18375<br>[Source:SWISS;ACC:P58223]                         | 21    | 0  | -14.8               | 1.38E-04 | GO:0003723, GO:0005634                                                                                                                                                 |
| U054928    | 2,403  | Zinc finger CCCH domain-containing<br>protein 19<br>[Source:SWISS;ACC:Q9SIV5]                  | 20.2  | 0  | -14.8               | 1.44E-04 | GO:0003677, GO:0005634, GO:0006352,<br>GO:0008270, GO:0010964, GO:0016570,<br>GO:0031047, GO:0032776, GO:0042393                                                       |

| Unigene ID | Length | Description                                                                           | FPKM   |    | Log <sub>2</sub> FC | P-value  | Gene ontology                                                             |
|------------|--------|---------------------------------------------------------------------------------------|--------|----|---------------------|----------|---------------------------------------------------------------------------|
|            |        |                                                                                       | NW     | AD |                     |          |                                                                           |
| U013224    | 1,075  | Probable receptor-like protein kinase<br>At2g39360<br>[Source:SWISS;ACC:O80623]       | 51.02  | 0  | -14.7               | 1.78E-04 | GO:0004674, GO:0005524, GO:0005886,<br>GO:0016021                         |
| U024932    | 1,065  | -                                                                                     | 51.29  | 0  | -14.7               | 1.85E-04 | -                                                                         |
| U025917    | 1,049  | -                                                                                     | 53.3   | 0  | -14.7               | 1.72E-04 | -                                                                         |
| U035855    | 985    | Polyubiquitin<br>[Source:SWISS;ACC:P0CG83]                                            | 56.1   | 0  | -14.7               | 1.97E-04 | GO:0005634, GO:0005737                                                    |
| U051690    | 1,583  | -                                                                                     | 31.03  | 0  | -14.7               | 1.81E-04 | -                                                                         |
| U054710    | 554    | -                                                                                     | 143.07 | 0  | -14.7               | 1.99E-04 | -                                                                         |
| U007390    | 1,263  | -                                                                                     | 38.98  | 0  | -14.6               | 2.24E-04 | -                                                                         |
| U015372    | 676    | -                                                                                     | 95.41  | 0  | -14.6               | 2.33E-04 | -                                                                         |
| U016920    | 938    | -                                                                                     | 55.86  | 0  | -14.6               | 2.61E-04 | -                                                                         |
| U017856    | 817    | -                                                                                     | 69.22  | 0  | -14.6               | 2.49E-04 | -                                                                         |
| U021134    | 1,418  | -                                                                                     | 32.23  | 0  | -14.6               | 2.67E-04 | -                                                                         |
| U027596    | 840    | Heavy metal-associated isoprenylated<br>plant protein 26<br>[Source:SWISS;ACC:Q9SZN7] | 64.32  | 0  | -14.6               | 2.83E-04 | GO:0005886, GO:0009506, GO:0010286,<br>GO:0030001, GO:0031965, GO:0046872 |

| Unigene ID | Length | Description                                                                            | FPKM  |    | Log <sub>2</sub> FC | P-value  | Gene ontology                                                                                                                                                                                                                                                                                                                                  |
|------------|--------|----------------------------------------------------------------------------------------|-------|----|---------------------|----------|------------------------------------------------------------------------------------------------------------------------------------------------------------------------------------------------------------------------------------------------------------------------------------------------------------------------------------------------|
|            |        |                                                                                        | NW    | AD |                     |          |                                                                                                                                                                                                                                                                                                                                                |
| U029501    | 1,069  | Chalcone--flavonone isomerase<br>[Source:SWISS;ACC:Q45QI7]                             | 48.24 | 0  | -14.6               | 2.29E-04 | GO:0009813, GO:0045430                                                                                                                                                                                                                                                                                                                         |
| U038944    | 1,403  | CBS domain-containing protein<br>CBSX2, chloroplastic<br>[Source:SWISS;ACC:Q9C5D0]     | 34.09 | 0  | -14.6               | 2.24E-04 | GO:0009507, GO:0009570, GO:0030554,<br>GO:0045454                                                                                                                                                                                                                                                                                              |
| U046248    | 2,661  | -                                                                                      | 15.38 | 0  | -14.6               | 2.69E-04 | -                                                                                                                                                                                                                                                                                                                                              |
| U049419    | 2,266  | Ubiquitin carboxyl-terminal hydrolase<br>22 [Source:SWISS;ACC:Q9LEW0]                  | 18.57 | 0  | -14.6               | 2.61E-04 | GO:0006511, GO:0008234, GO:0008270,<br>GO:0036459                                                                                                                                                                                                                                                                                              |
| U050533    | 1,855  | Beta-lactamase-like protein 2<br>[Source:SWISS;ACC:Q0V9A9]                             | 24.47 | 0  | -14.6               | 2.20E-04 | GO:0016787, GO:0046872                                                                                                                                                                                                                                                                                                                         |
| U056373    | 1,952  | Probable galacturonosyltransferase-like<br>7 [Source:SWISS;ACC:Q8VYF4]                 | 22.67 | 0  | -14.6               | 2.35E-04 | GO:0000139, GO:0005794, GO:0016021,<br>GO:0045489, GO:0047262, GO:0071555                                                                                                                                                                                                                                                                      |
| U001007    | 651    | -                                                                                      | 95.01 | 0  | -14.5               | 3.03E-04 | -                                                                                                                                                                                                                                                                                                                                              |
| U018210    | 1,675  | 26S proteasome non-ATPase regulatory<br>subunit 4 homolog<br>[Source:SWISS;ACC:P55034] | 25.82 | 0  | -14.5               | 2.86E-04 | GO:0000502, GO:0001653, GO:0005634,<br>GO:0005829, GO:0006974, GO:0007165,<br>GO:0008540, GO:0009408, GO:0009555,<br>GO:0009651, GO:0009733, GO:0009735,<br>GO:0009737, GO:0009744, GO:0010029,<br>GO:0010150, GO:0016020, GO:0030163,<br>GO:0031593, GO:0043161, GO:0043248,<br>GO:0048366, GO:0048455, GO:0048528,<br>GO:0048767, GO:0051788 |



| Unigene ID | Length | Description                                                                          | FPKM  |    | Log <sub>2</sub> FC | P-value  | Gene ontology                                                                                                                                                                      |
|------------|--------|--------------------------------------------------------------------------------------|-------|----|---------------------|----------|------------------------------------------------------------------------------------------------------------------------------------------------------------------------------------|
|            |        |                                                                                      | NW    | AD |                     |          |                                                                                                                                                                                    |
| U021358    | 914    | -                                                                                    | 53.13 | 0  | -14.5               | 3.65E-04 | -                                                                                                                                                                                  |
| U032284    | 1,788  | Glutathione S-transferase DHAR2<br>[Source:SWISS;ACC:Q9FRL8]                         | 23.72 | 0  | -14.5               | 2.94E-04 | GO:0004364, GO:0005829, GO:0005886,<br>GO:0009636, GO:0010731, GO:0043295,<br>GO:0045174, GO:0055114                                                                               |
| U034524    | 1,938  | Acetolactate synthase small subunit 1,<br>chloroplastic<br>[Source:SWISS;ACC:Q9FFF4] | 20.9  | 0  | -14.5               | 3.32E-04 | GO:0003984, GO:0005829, GO:0006551,<br>GO:0006573, GO:0009097, GO:0009099,<br>GO:0009507, GO:0016597                                                                               |
| U038804    | 2,208  | Protein NRT1/ PTR FAMILY 8.3<br>[Source:SWISS;ACC:P46032]                            | 18.59 | 0  | -14.5               | 2.91E-04 | GO:0000325, GO:0005773, GO:0005774,<br>GO:0005794, GO:0009705, GO:0015031,<br>GO:0015197, GO:0015334, GO:0015833,<br>GO:0016021, GO:0042936, GO:0042937,<br>GO:0042938, GO:0042939 |
| U038806    | 2,192  | Protein NRT1/ PTR FAMILY 8.3<br>[Source:SWISS;ACC:P46032]                            | 18.58 | 0  | -14.5               | 3.03E-04 | GO:0000325, GO:0005773, GO:0005774,<br>GO:0005794, GO:0009705, GO:0015031,<br>GO:0015197, GO:0015334, GO:0015833,<br>GO:0016021, GO:0042936, GO:0042937,<br>GO:0042938, GO:0042939 |
| U042081    | 1,743  | Putative receptor protein kinase ZmPK1<br>[Source:SWISS;ACC:P17801]                  | 24.19 | 0  | -14.5               | 3.06E-04 | GO:0004674, GO:0005524, GO:0016021,<br>GO:0048544                                                                                                                                  |
| U054926    | 2,464  | Zinc finger CCCH domain-containing<br>protein 19<br>[Source:SWISS;ACC:Q9SIV5]        | 15.5  | 0  | -14.5               | 3.65E-04 | GO:0003677, GO:0005634, GO:0006352,<br>GO:0008270, GO:0010964, GO:0016570,<br>GO:0031047, GO:0032776, GO:0042393                                                                   |
| U064350    | 1,028  | -                                                                                    | 45    | 0  | -14.5               | 3.68E-04 | -                                                                                                                                                                                  |

| Unigene ID | Length | Description                                                                                                | FPKM   |    | Log <sub>2</sub> FC | P-value  | Gene ontology                                                                                                    |
|------------|--------|------------------------------------------------------------------------------------------------------------|--------|----|---------------------|----------|------------------------------------------------------------------------------------------------------------------|
|            |        |                                                                                                            | NW     | AD |                     |          |                                                                                                                  |
| U024593    | 1,385  | Putative ALA-interacting subunit 2<br>[Source:SWISS;ACC:Q67YS6]                                            | 30.42  | 0  | -14.4               | 3.72E-04 | GO:0016021                                                                                                       |
| U036164    | 1,075  | -                                                                                                          | 39.66  | 0  | -14.4               | 4.72E-04 | -                                                                                                                |
| U070452    | 687    | -                                                                                                          | 79.94  | 0  | -14.4               | 4.14E-04 | -                                                                                                                |
| U085823    | 544    | -                                                                                                          | 122.98 | 0  | -14.4               | 4.10E-04 | -                                                                                                                |
| U058839    | 1,121  | Putative Holliday junction resolvase<br>{ECO:0000255}HAMAP-<br>Rule:MF_00651}<br>[Source:SWISS;ACC:Q045P4] | 35.31  | 0  | -14.3               | 5.91E-04 | GO:0003676, GO:0004518, GO:0005737,<br>GO:0006281, GO:0006310                                                    |
| U094686    | 2,721  | Serine/threonine-protein phosphatase 5<br>[Source:SWISS;ACC:Q84K11]                                        | 12.34  | 0  | -14.3               | 5.64E-04 | GO:0004721, GO:0005789, GO:0006470,<br>GO:0016021, GO:0016607, GO:0031965,<br>GO:0046872                         |
| U014751    | 2,528  | Zinc finger CCCH domain-containing<br>protein 19<br>[Source:SWISS;ACC:Q9SIV5]                              | 12.38  | 0  | -14.2               | 7.58E-04 | GO:0003677, GO:0005634, GO:0006352,<br>GO:0008270, GO:0010964, GO:0016570,<br>GO:0031047, GO:0032776, GO:0042393 |
| U015093    | 678    | -                                                                                                          | 70.74  | 0  | -14.2               | 7.05E-04 | -                                                                                                                |
| U033355    | 1,284  | 5'-adenylylsulfate reductase-like 5<br>[Source:SWISS;ACC:Q93YX4]                                           | 27.3   | 0  | -14.2               | 7.95E-04 | GO:0016021, GO:0045454                                                                                           |
| U056368    | 1,711  | Probable galacturonosyltransferase-like<br>7 [Source:SWISS;ACC:Q8VYF4]                                     | 19.68  | 0  | -14.2               | 7.22E-04 | GO:0000139, GO:0005794, GO:0016021,<br>GO:0045489, GO:0047262, GO:0071555                                        |

| Unigene ID | Length | Description                                                                                  | FPKM  |    | Log <sub>2</sub> FC | P-value  | Gene ontology                                                                                                    |
|------------|--------|----------------------------------------------------------------------------------------------|-------|----|---------------------|----------|------------------------------------------------------------------------------------------------------------------|
|            |        |                                                                                              | NW    | AD |                     |          |                                                                                                                  |
| U001774    | 731    | -                                                                                            | 56.4  | 0  | -14.1               | 1.02E-03 | -                                                                                                                |
| U023278    | 1,567  | F-box/kelch-repeat protein At3g06240<br>[Source:SWISS;ACC:Q8GXC7]                            | 21.06 | 0  | -14.1               | 8.25E-04 | -                                                                                                                |
| U023546    | 1,215  | -                                                                                            | 28.89 | 0  | -14.1               | 8.35E-04 | -                                                                                                                |
| U029606    | 1,290  | -                                                                                            | 25.24 | 0  | -14.1               | 1.04E-03 | -                                                                                                                |
| U035277    | 2,224  | DEAD-box ATP-dependent RNA<br>helicase 53<br>[Source:SWISS;ACC:Q9LUW5]                       | 13.64 | 0  | -14.1               | 9.00E-04 | GO:0000373, GO:0003723, GO:0004386,<br>GO:0005524, GO:0005618, GO:0005730,<br>GO:0005739, GO:0009409, GO:0043234 |
| U040698    | 811    | -                                                                                            | 48.07 | 0  | -14.1               | 1.02E-03 | -                                                                                                                |
| U042942    | 2,412  | Peptide-N(4)-(N-acetyl-beta-<br>glucosaminyl)asparagine amidase<br>[Source:SWISS;ACC:Q9FGY9] | 12.11 | 0  | -14.1               | 9.96E-04 | GO:0000224, GO:0003684, GO:0005634,<br>GO:0005829, GO:0006289, GO:0009751,<br>GO:0010188, GO:0010193, GO:0046872 |
| U057327    | 1,254  | DNA-damage-repair/toleration protein<br>DRT100<br>[Source:SWISS;ACC:Q00874]                  | 26.44 | 0  | -14.1               | 9.96E-04 | GO:0000166, GO:0006281, GO:0009411,<br>GO:0009507, GO:0042493                                                    |
| U058119    | 980    | -                                                                                            | 37.37 | 0  | -14.1               | 9.35E-04 | -                                                                                                                |
| U062215    | 730    | -                                                                                            | 58.45 | 0  | -14.1               | 9.11E-04 | -                                                                                                                |
| U063934    | 976    | -                                                                                            | 37.77 | 0  | -14.1               | 9.23E-04 | -                                                                                                                |

| Unigene ID | Length | Description                                                                                | FPKM  |    | Log <sub>2</sub> FC | P-value  | Gene ontology                                                                                                                   |
|------------|--------|--------------------------------------------------------------------------------------------|-------|----|---------------------|----------|---------------------------------------------------------------------------------------------------------------------------------|
|            |        |                                                                                            | NW    | AD |                     |          |                                                                                                                                 |
| U085186    | 1,036  | -                                                                                          | 34.01 | 0  | -14.1               | 9.96E-04 | -                                                                                                                               |
| U012721    | 1,041  | Protein CREG1<br>[Source:SWISS;ACC:O75629]                                                 | 32.98 | 0  | -14                 | 1.09E-03 | GO:0003714, GO:0005667, GO:0006357,<br>GO:0007275, GO:0008283, GO:0010181,<br>GO:0016491, GO:0040008, GO:0070062,<br>GO:1903507 |
| U019937    | 1,192  | Probable calcium-binding protein<br>CML21 [Source:SWISS;ACC:Q52K82]                        | 26.12 | 0  | -14                 | 1.32E-03 | GO:0005509, GO:0005737                                                                                                          |
| U021458    | 1,032  | -                                                                                          | 33.81 | 0  | -14                 | 1.04E-03 | -                                                                                                                               |
| U024736    | 1,320  | Quinone oxidoreductase 1<br>[Source:SWISS;ACC:P28304]                                      | 23.43 | 0  | -14                 | 1.21E-03 | GO:0003960, GO:0005737, GO:0008270                                                                                              |
| U028119    | 620    | -                                                                                          | 73.36 | 0  | -14                 | 1.09E-03 | -                                                                                                                               |
| U035810    | 841    | -                                                                                          | 44.38 | 0  | -14                 | 1.11E-03 | -                                                                                                                               |
| U040374    | 1,673  | Probable membrane-associated 30 kDa<br>protein, chloroplastic<br>[Source:SWISS;ACC:Q8S0J7] | 18    | 0  | -14                 | 1.09E-03 | GO:0009508, GO:0009535, GO:0009570,<br>GO:0009706, GO:0010027, GO:0016032,<br>GO:0016050                                        |
| U049119    | 818    | -                                                                                          | 45.81 | 0  | -14                 | 1.15E-03 | -                                                                                                                               |
| U056412    | 1,167  | -                                                                                          | 27.47 | 0  | -14                 | 1.21E-03 | -                                                                                                                               |
| U063380    | 1,141  | -                                                                                          | 28.26 | 0  | -14                 | 1.21E-03 | -                                                                                                                               |

| Unigene ID | Length | Description                                                                            | FPKM  |    | Log <sub>2</sub> FC | P-value  | Gene ontology                                                                                                                                                                                                                                                                                                                                  |
|------------|--------|----------------------------------------------------------------------------------------|-------|----|---------------------|----------|------------------------------------------------------------------------------------------------------------------------------------------------------------------------------------------------------------------------------------------------------------------------------------------------------------------------------------------------|
|            |        |                                                                                        | NW    | AD |                     |          |                                                                                                                                                                                                                                                                                                                                                |
| U017683    | 1,906  | Pyruvate kinase, cytosolic isozyme<br>[Source:SWISS;ACC:Q42806]                        | 14.48 | 0  | -13.9               | 1.37E-03 | GO:0000287, GO:0004743, GO:0005524,<br>GO:0005737, GO:0006096, GO:0030955                                                                                                                                                                                                                                                                      |
| U025727    | 1,160  | 26S proteasome non-ATPase regulatory<br>subunit 4 homolog<br>[Source:SWISS;ACC:P55034] | 25.81 | 0  | -13.9               | 1.56E-03 | GO:0000502, GO:0001653, GO:0005634,<br>GO:0005829, GO:0006974, GO:0007165,<br>GO:0008540, GO:0009408, GO:0009555,<br>GO:0009651, GO:0009733, GO:0009735,<br>GO:0009737, GO:0009744, GO:0010029,<br>GO:0010150, GO:0016020, GO:0030163,<br>GO:0031593, GO:0043161, GO:0043248,<br>GO:0048366, GO:0048455, GO:0048528,<br>GO:0048767, GO:0051788 |
| U041818    | 2,015  | Multidrug and toxin extrusion protein 1<br>[Source:SWISS;ACC:A4IIS8]                   | 12.97 | 0  | -13.9               | 1.60E-03 | GO:0005886, GO:0015238, GO:0015297,<br>GO:0016021                                                                                                                                                                                                                                                                                              |
| U047571    | 1,398  | -                                                                                      | 20.33 | 0  | -13.9               | 1.53E-03 | -                                                                                                                                                                                                                                                                                                                                              |
| U089879    | 795    | -                                                                                      | 44.49 | 0  | -13.9               | 1.49E-03 | -                                                                                                                                                                                                                                                                                                                                              |
| U093294    | 672    | -                                                                                      | 59    | 0  | -13.9               | 1.43E-03 | -                                                                                                                                                                                                                                                                                                                                              |
| U011831    | 1,651  | Putative ribonuclease H protein<br>At1g65750<br>[Source:SWISS;ACC:POC2F6]              | 15.61 | 0  | -13.8               | 1.91E-03 | GO:0003676, GO:0004523, GO:0046872                                                                                                                                                                                                                                                                                                             |
| U013900    | 592    | -                                                                                      | 67.87 | 0  | -13.8               | 1.94E-03 | -                                                                                                                                                                                                                                                                                                                                              |
| U014897    | 2,131  | Dammarenediol II synthase<br>[Source:SWISS;ACC:Q08IT1]                                 | 11.32 | 0  | -13.8               | 2.06E-03 | GO:0016021, GO:0016829, GO:0016866                                                                                                                                                                                                                                                                                                             |

| Unigene ID | Length | Description                                                                                    | FPKM  |    | Log <sub>2</sub> FC | P-value  | Gene ontology                                                                                                                                   |
|------------|--------|------------------------------------------------------------------------------------------------|-------|----|---------------------|----------|-------------------------------------------------------------------------------------------------------------------------------------------------|
|            |        |                                                                                                | NW    | AD |                     |          |                                                                                                                                                 |
| U020608    | 2,242  | -                                                                                              | 11.2  | 0  | -13.8               | 1.75E-03 | -                                                                                                                                               |
| U020780    | 1,725  | Structural maintenance of chromosomes protein 1<br>[Source:SWISS;ACC:Q6Q1P4]                   | 14.94 | 0  | -13.8               | 1.86E-03 | GO:0003682, GO:0005524, GO:0005634, GO:0006281, GO:0007059, GO:0007064, GO:0008278, GO:0051321                                                  |
| U024732    | 1,718  | Pyruvate dehydrogenase E1 component subunit beta-1, mitochondrial<br>[Source:SWISS;ACC:Q38799] | 14.67 | 0  | -13.8               | 2.00E-03 | GO:0004739, GO:0005730, GO:0005739, GO:0005759, GO:0005774, GO:0006086, GO:0006096, GO:0042742, GO:0048046                                      |
| U028329    | 1,258  | Uncharacterized protein ycf37<br>[Source:SWISS;ACC:O78458]                                     | 22.34 | 0  | -13.8               | 1.77E-03 | GO:0009507                                                                                                                                      |
| U028338    | 1,325  | -                                                                                              | 20.89 | 0  | -13.8               | 1.77E-03 | -                                                                                                                                               |
| U034171    | 602    | -                                                                                              | 65.71 | 0  | -13.8               | 1.94E-03 | -                                                                                                                                               |
| U040774    | 751    | -                                                                                              | 44    | 0  | -13.8               | 2.10E-03 | -                                                                                                                                               |
| U043406    | 647    | -                                                                                              | 56.41 | 0  | -13.8               | 2.10E-03 | -                                                                                                                                               |
| U048417    | 2,684  | Serine/threonine protein phosphatase 2A regulatory subunit B"beta<br>[Source:SWISS;ACC:Q5QIT3] | 8.74  | 0  | -13.8               | 2.03E-03 | GO:0005509, GO:0005829                                                                                                                          |
| U051216    | 3,261  | Serine/threonine-protein kinase EDR1<br>[Source:SWISS;ACC:Q9FPR3]                              | 7.18  | 0  | -13.8               | 1.91E-03 | GO:0000165, GO:0000186, GO:0002229, GO:0004709, GO:0004712, GO:0005524, GO:0005634, GO:0005769, GO:0005783, GO:0005802, GO:0005829, GO:0008219, |

| Unigene ID | Length | Description                                                                                                | FPKM  |    | Log <sub>2</sub> FC | P-value  | Gene ontology                                                                                                                                  |
|------------|--------|------------------------------------------------------------------------------------------------------------|-------|----|---------------------|----------|------------------------------------------------------------------------------------------------------------------------------------------------|
|            |        |                                                                                                            | NW    | AD |                     |          |                                                                                                                                                |
|            |        |                                                                                                            |       |    |                     |          | GO:0009414, GO:0009617, GO:0009620, GO:0009723, GO:0009738, GO:0009788, GO:0009873, GO:0016301, GO:0046777, GO:1900150, GO:1900424, GO:2000031 |
| U053082    | 660    | -                                                                                                          | 56    | 0  | -13.8               | 1.91E-03 | -                                                                                                                                              |
| U054349    | 2,017  | Protein MOR1<br>[Source:SWISS;ACC:Q5N749]                                                                  | 12.51 | 0  | -13.8               | 1.80E-03 | GO:0005737, GO:0005874                                                                                                                         |
| U000600    | 958    | Putative Holliday junction resolvase<br>{ECO:0000255 HAMAP-<br>Rule:MF_00651}<br>[Source:SWISS;ACC:B8I4S7] | 29.11 | 0  | -13.7               | 2.54E-03 | GO:0003676, GO:0004518, GO:0005737, GO:0006281, GO:0006310                                                                                     |
| U003895    | 1,119  | -                                                                                                          | 24.27 | 0  | -13.7               | 2.27E-03 | -                                                                                                                                              |
| U018328    | 1,323  | -                                                                                                          | 19.81 | 0  | -13.7               | 2.16E-03 | -                                                                                                                                              |
| U032304    | 2,311  | Molybdopterin biosynthesis protein<br>CNX1 [Source:SWISS;ACC:Q39054]                                       | 9.82  | 0  | -13.7               | 2.46E-03 | GO:0005524, GO:0005829, GO:0006777, GO:0009734, GO:0030151, GO:0061598, GO:0061599                                                             |
| U041414    | 1,506  | Protein NLP3<br>[Source:SWISS;ACC:Q5NB82]                                                                  | 16.38 | 0  | -13.7               | 2.38E-03 | GO:0003677, GO:0005634, GO:0006351, GO:0006355                                                                                                 |
| U043316    | 1,777  | Polyadenylate-binding protein RBP47B'<br>[Source:SWISS;ACC:Q8VXZ9]                                         | 13.48 | 0  | -13.7               | 2.34E-03 | GO:0000166, GO:0005634, GO:0006397, GO:0008143, GO:0010494, GO:0034605                                                                         |

| Unigene ID | Length | Description                                                                           | FPKM  |    | Log <sub>2</sub> FC | P-value  | Gene ontology                                                                                                                                           |
|------------|--------|---------------------------------------------------------------------------------------|-------|----|---------------------|----------|---------------------------------------------------------------------------------------------------------------------------------------------------------|
|            |        |                                                                                       | NW    | AD |                     |          |                                                                                                                                                         |
| U043740    | 1,432  | Probable serine/threonine-protein kinase<br>DDB_G0276461<br>[Source:SWISS;ACC:Q86HW6] | 17.61 | 0  | -13.7               | 2.30E-03 | GO:0004674, GO:0005524                                                                                                                                  |
| U046340    | 1,973  | Probable polyamine oxidase 5<br>[Source:SWISS;ACC:Q9SU79]                             | 12.16 | 0  | -13.7               | 2.20E-03 | GO:0016491                                                                                                                                              |
| U046869    | 1,478  | F-box/FBD/LRR-repeat protein<br>At1g13570<br>[Source:SWISS;ACC:Q9FZ70]                | 16.78 | 0  | -13.7               | 2.38E-03 | -                                                                                                                                                       |
| U048221    | 1,033  | 11-beta-hydroxysteroid dehydrogenase<br>1B [Source:SWISS;ACC:P0DKC6]                  | 26.57 | 0  | -13.7               | 2.42E-03 | GO:0005811, GO:0006694, GO:0016021,<br>GO:0070524                                                                                                       |
| U054341    | 2,348  | Glutamate receptor 3.6<br>[Source:SWISS;ACC:Q84W41]                                   | 9.58  | 0  | -13.7               | 2.50E-03 | GO:0004970, GO:0005234, GO:0005262,<br>GO:0005886, GO:0006816, GO:0008066,<br>GO:0009611, GO:0009864, GO:0016021,<br>GO:0019722, GO:0070588, GO:0071230 |
| U080883    | 676    | -                                                                                     | 51.66 | 0  | -13.7               | 2.20E-03 | -                                                                                                                                                       |
| U004461    | 1,315  | -                                                                                     | 18.42 | 0  | -13.6               | 2.85E-03 | -                                                                                                                                                       |
| U014436    | 1,914  | Cyclin-A2-1<br>[Source:SWISS;ACC:Q39071]                                              | 11.52 | 0  | -13.6               | 3.00E-03 | GO:0000079, GO:0005634, GO:0007049,<br>GO:0051301                                                                                                       |
| U022553    | 911    | 14 kDa zinc-binding protein<br>[Source:SWISS;ACC:P42856]                              | 29.47 | 0  | -13.6               | 3.11E-03 | GO:0003824                                                                                                                                              |



| Unigene ID | Length | Description                                                                                                               | FPKM  |    | Log <sub>2</sub> FC | P-value  | Gene ontology                                                                                                          |
|------------|--------|---------------------------------------------------------------------------------------------------------------------------|-------|----|---------------------|----------|------------------------------------------------------------------------------------------------------------------------|
|            |        |                                                                                                                           | NW    | AD |                     |          |                                                                                                                        |
| U023192    | 983    | -                                                                                                                         | 26.31 | 0  | -13.6               | 3.17E-03 | -                                                                                                                      |
| U027613    | 866    | ER membrane protein complex subunit 4 [Source:SWISS;ACC:Q6P011]                                                           | 32.78 | 0  | -13.6               | 2.76E-03 | GO:0016021, GO:0072546                                                                                                 |
| U033714    | 1,624  | Polycomb group protein FERTILIZATION-INDEPENDENT ENDOSPERM [Source:SWISS;ACC:Q9LT47]                                      | 13.69 | 0  | -13.6               | 3.22E-03 | GO:0003700, GO:0005677, GO:0006349, GO:0006351, GO:0007275, GO:0009409, GO:0016571, GO:0043078, GO:2000014             |
| U035644    | 1,172  | -                                                                                                                         | 20.93 | 0  | -13.6               | 3.06E-03 | -                                                                                                                      |
| U040546    | 2,671  | Gamma-tubulin complex component 2 [Source:SWISS;ACC:Q9C5H9]                                                               | 7.57  | 0  | -13.6               | 3.46E-03 | GO:0000226, GO:0000922, GO:0000930, GO:0005635, GO:0005737, GO:0005938, GO:0033566, GO:0048229, GO:0055028, GO:0090063 |
| U041696    | 1,120  | Glucuronoxylan 4-O-methyltransferase 3 [Source:SWISS;ACC:Q9LQ32]                                                          | 22.13 | 0  | -13.6               | 3.11E-03 | GO:0000139, GO:0005794, GO:0005976, GO:0009808, GO:0016021, GO:0030775, GO:0045491                                     |
| U041844    | 1,920  | -                                                                                                                         | 11.06 | 0  | -13.6               | 3.40E-03 | -                                                                                                                      |
| U043803    | 1,172  | -                                                                                                                         | 21.39 | 0  | -13.6               | 2.85E-03 | -                                                                                                                      |
| U046469    | 2,221  | Ribulose-1,5 biphosphate carboxylase/oxygenase large subunit N-methyltransferase, chloroplastic [Source:SWISS;ACC:P94026] | 9.66  | 0  | -13.6               | 3.06E-03 | GO:0009507, GO:0030785                                                                                                 |

| Unigene ID | Length | Description                                                                                       | FPKM  |    | Log <sub>2</sub> FC | P-value  | Gene ontology                                                                                                                   |
|------------|--------|---------------------------------------------------------------------------------------------------|-------|----|---------------------|----------|---------------------------------------------------------------------------------------------------------------------------------|
|            |        |                                                                                                   | NW    | AD |                     |          |                                                                                                                                 |
| U084805    | 518    | -                                                                                                 | 75.68 | 0  | -13.6               | 3.40E-03 | -                                                                                                                               |
| U093736    | 889    | -                                                                                                 | 31.1  | 0  | -13.6               | 2.90E-03 | -                                                                                                                               |
| U023279    | 925    | -                                                                                                 | 26.83 | 0  | -13.5               | 4.00E-03 | -                                                                                                                               |
| U024678    | 1,351  | Caffeic acid 3-O-methyltransferase<br>[Source:SWISS;ACC:Q43239]                                   | 16.69 | 0  | -13.5               | 3.59E-03 | GO:0009809, GO:0047763                                                                                                          |
| U024733    | 1,636  | Pyruvate dehydrogenase E1 component<br>subunit beta-1, mitochondrial<br>[Source:SWISS;ACC:Q38799] | 12.73 | 0  | -13.5               | 4.08E-03 | GO:0004739, GO:0005730, GO:0005739,<br>GO:0005759, GO:0005774, GO:0006086,<br>GO:0006096, GO:0042742, GO:0048046                |
| U028030    | 806    | -                                                                                                 | 33.34 | 0  | -13.5               | 3.79E-03 | -                                                                                                                               |
| U039931    | 2,635  | Protease 2<br>[Source:SWISS;ACC:Q59536]                                                           | 7.64  | 0  | -13.5               | 3.52E-03 | GO:0004252, GO:0070008                                                                                                          |
| U040221    | 2,279  | F-box/FBD/LRR-repeat protein<br>At1g13570<br>[Source:SWISS;ACC:Q9FZ70]                            | 8.72  | 0  | -13.5               | 3.93E-03 | -                                                                                                                               |
| U041487    | 1,245  | Probable mediator of RNA polymerase<br>II transcription subunit 36b<br>[Source:SWISS;ACC:Q9FEF8]  | 18.62 | 0  | -13.5               | 3.52E-03 | GO:0001510, GO:0005730, GO:0006351,<br>GO:0006355, GO:0006364, GO:0008033,<br>GO:0008168, GO:0016020, GO:0030515,<br>GO:0030529 |
| U041904    | 1,402  | MLO-like protein 5<br>[Source:SWISS;ACC:O22815]                                                   | 15.27 | 0  | -13.5               | 4.16E-03 | GO:0006952, GO:0009607, GO:0016021                                                                                              |

| Unigene ID | Length | Description                                             | FPKM   |      | Log <sub>2</sub> FC | P-value  | Gene ontology                                                                                                                   |
|------------|--------|---------------------------------------------------------|--------|------|---------------------|----------|---------------------------------------------------------------------------------------------------------------------------------|
|            |        |                                                         | NW     | AD   |                     |          |                                                                                                                                 |
| U042156    | 1,042  | -                                                       | 22.29  | 0    | -13.5               | 4.24E-03 | -                                                                                                                               |
| U043033    | 2,778  | Protein MEI2-like 2<br>[Source:SWISS;ACC:Q6ZI17]        | 7.14   | 0    | -13.5               | 3.65E-03 | GO:0000166, GO:0003723                                                                                                          |
| U046871    | 630    | -                                                       | 51.19  | 0    | -13.5               | 3.46E-03 | -                                                                                                                               |
| U048740    | 2,749  | -                                                       | 7.03   | 0    | -13.5               | 4.00E-03 | -                                                                                                                               |
| U053523    | 1,242  | Xylosyltransferase 2<br>[Source:SWISS;ACC:Q9EPL0]       | 18.3   | 0    | -13.5               | 3.79E-03 | GO:0000139, GO:0005789, GO:0006024,<br>GO:0008375, GO:0015012, GO:0016021,<br>GO:0030158, GO:0030166, GO:0030206,<br>GO:0030210 |
| U087535    | 764    | -                                                       | 35.37  | 0    | -13.5               | 4.08E-03 | -                                                                                                                               |
| U004138    | 684    | -                                                       | 41.06  | 0    | -13.4               | 4.57E-03 | -                                                                                                                               |
| U006160    | 647    | -                                                       | 44.4   | 0    | -13.4               | 4.84E-03 | -                                                                                                                               |
| U043269    | 1,232  | Tubby-like F-box protein 5<br>[Source:SWISS;ACC:Q6Z2G9] | 17.18  | 0    | -13.4               | 4.84E-03 | -                                                                                                                               |
| U029545    | 1,731  | -                                                       | 187.31 | 0.07 | -10.8               | 5.52E-07 | -                                                                                                                               |
| U012666    | 980    | -                                                       | 347.44 | 0.14 | -10.7               | 7.43E-07 | -                                                                                                                               |
| U089492    | 2,152  | -                                                       | 80.45  | 0.05 | -9.97               | 3.49E-06 | -                                                                                                                               |

| Unigene ID | Length | Description                                                                                        | FPKM   |      | Log <sub>2</sub> FC | P-value  | Gene ontology                                                                                                                                   |
|------------|--------|----------------------------------------------------------------------------------------------------|--------|------|---------------------|----------|-------------------------------------------------------------------------------------------------------------------------------------------------|
|            |        |                                                                                                    | NW     | AD   |                     |          |                                                                                                                                                 |
| U016070    | 1,001  | -                                                                                                  | 363.21 | 0.28 | -9.77               | 1.40E-06 | -                                                                                                                                               |
| U008940    | 10,515 | Retrovirus-related Pol polyprotein from transposon TNT 1-94<br>[Source:SWISS;ACC:P10978]           | 15.37  | 0.02 | -9.03               | 6.85E-06 | GO:0003676, GO:0003964, GO:0004190, GO:0004519, GO:0008270, GO:0015074                                                                          |
| U029524    | 1,927  | Origin of replication complex subunit 5 {ECO:0000303 PubMed:16179646}<br>[Source:SWISS;ACC:Q6EWX0] | 46.19  | 0.06 | -8.98               | 4.65E-05 | GO:0000808, GO:0005634, GO:0006260                                                                                                              |
| U038860    | 3,257  | Arginine--tRNA ligase {ECO:0000255 HAMAP-Rule:MF_00123}<br>[Source:SWISS;ACC:Q5N643]               | 245.41 | 0.32 | -8.94               | 4.67E-06 | GO:0004814, GO:0005524, GO:0005737, GO:0006420                                                                                                  |
| U006456    | 615    | -                                                                                                  | 217.03 | 0.32 | -8.93               | 5.41E-05 | -                                                                                                                                               |
| U093336    | 541    | -                                                                                                  | 195.2  | 0.41 | -8.42               | 2.16E-04 | -                                                                                                                                               |
| U046195    | 1,738  | -                                                                                                  | 427.2  | 0.89 | -8.28               | 9.48E-06 | -                                                                                                                                               |
| U061788    | 838    | -                                                                                                  | 78.12  | 0.18 | -8.18               | 4.01E-04 | -                                                                                                                                               |
| U091458    | 748    | -                                                                                                  | 90.55  | 0.22 | -8.15               | 4.45E-04 | -                                                                                                                                               |
| U050685    | 735    | Probable V-type proton ATPase subunit H [Source:SWISS;ACC:Q84ZC0]                                  | 185.26 | 0.47 | -8.09               | 6.61E-05 | GO:0000221, GO:0000325, GO:0000902, GO:0005794, GO:0005886, GO:0006486, GO:0006623, GO:0006816, GO:0007030, GO:0007033, GO:0009507, GO:0009651, |

| Unigene ID | Length | Description                                                                         | FPKM   |      | Log <sub>2</sub> FC | P-value  | Gene ontology                                                                                                                                                                                                                                                                                                          |
|------------|--------|-------------------------------------------------------------------------------------|--------|------|---------------------|----------|------------------------------------------------------------------------------------------------------------------------------------------------------------------------------------------------------------------------------------------------------------------------------------------------------------------------|
|            |        |                                                                                     | NW     | AD   |                     |          |                                                                                                                                                                                                                                                                                                                        |
|            |        |                                                                                     |        |      |                     |          | GO:0015991, GO:0016049, GO:0046961, GO:0048193                                                                                                                                                                                                                                                                         |
| U028564    | 792    | -                                                                                   | 78.33  | 0.2  | -8.04               | 5.49E-04 | -                                                                                                                                                                                                                                                                                                                      |
| U025729    | 1,229  | 26S proteasome non-ATPase regulatory subunit 4 homolog<br>[Source:SWISS;ACC:P55034] | 99.33  | 0.27 | -7.94               | 7.83E-05 | GO:0000502, GO:0001653, GO:0005634, GO:0005829, GO:0006974, GO:0007165, GO:0008540, GO:0009408, GO:0009555, GO:0009651, GO:0009733, GO:0009735, GO:0009737, GO:0009744, GO:0010029, GO:0010150, GO:0016020, GO:0030163, GO:0031593, GO:0043161, GO:0043248, GO:0048366, GO:0048455, GO:0048528, GO:0048767, GO:0051788 |
| U032373    | 1,214  | Bidirectional sugar transporter SWEET10<br>[Source:SWISS;ACC:Q9LUE3]                | 38.34  | 0.11 | -7.9                | 8.38E-04 | GO:0005887, GO:0008515, GO:0015770, GO:0034219, GO:0051119                                                                                                                                                                                                                                                             |
| U031351    | 778    | -                                                                                   | 745.11 | 2.26 | -7.82               | 1.51E-05 | -                                                                                                                                                                                                                                                                                                                      |
| U031347    | 525    | Glutamine synthetase nodule isozyme<br>[Source:SWISS;ACC:P08282]                    | 272.66 | 0.88 | -7.81               | 1.58E-04 | GO:0004356, GO:0005524, GO:0005737, GO:0006542, GO:0009399                                                                                                                                                                                                                                                             |
| U020461    | 838    | -                                                                                   | 59.08  | 0.18 | -7.78               | 1.12E-03 | -                                                                                                                                                                                                                                                                                                                      |
| U011807    | 1,365  | Histone deacetylase 14<br>[Source:SWISS;ACC:Q941D6]                                 | 29.35  | 0.09 | -7.73               | 1.28E-03 | GO:0005634, GO:0005829, GO:0006351, GO:0006355, GO:0009507, GO:0032041, GO:0042903, GO:0043014, GO:0043621, GO:0046969, GO:0046970, GO:0048487, GO:0051721, GO:0090042, GO:0097372                                                                                                                                     |

| Unigene ID | Length | Description                                                                          | FPKM   |      | Log <sub>2</sub> FC | P-value  | Gene ontology                                     |
|------------|--------|--------------------------------------------------------------------------------------|--------|------|---------------------|----------|---------------------------------------------------|
|            |        |                                                                                      | NW     | AD   |                     |          |                                                   |
| U002412    | 764    | -                                                                                    | 128.12 | 0.43 | -7.69               | 2.14E-04 | -                                                 |
| U032319    | 981    | -                                                                                    | 84.04  | 0.29 | -7.62               | 2.62E-04 | -                                                 |
| U025313    | 2,098  | Aspartic proteinase-like protein 2<br>[Source:SWISS;ACC:Q9S9K4]                      | 82.14  | 0.28 | -7.58               | 3.70E-05 | GO:0004190, GO:0005886, GO:0031225,<br>GO:0046658 |
| U036718    | 801    | -                                                                                    | 51.16  | 0.2  | -7.48               | 2.34E-03 | -                                                 |
| U024671    | 781    | -                                                                                    | 53.01  | 0.2  | -7.47               | 2.37E-03 | -                                                 |
| U055468    | 2,777  | -                                                                                    | 31.82  | 0.12 | -7.46               | 1.49E-04 | -                                                 |
| U033468    | 568    | -                                                                                    | 89.66  | 0.37 | -7.44               | 2.57E-03 | -                                                 |
| U025164    | 979    | -                                                                                    | 77.31  | 0.31 | -7.4                | 3.61E-04 | -                                                 |
| U023749    | 1,518  | Omega-6 fatty acid desaturase,<br>endoplasmic reticulum<br>[Source:SWISS;ACC:Q39287] | 148.34 | 0.63 | -7.26               | 4.83E-05 | GO:0005789, GO:0006636, GO:0016021,<br>GO:0016491 |
| U040767    | 1,535  | Endoglucanase 24<br>[Source:SWISS;ACC:Q93YQ7]                                        | 68.04  | 0.29 | -7.23               | 1.80E-04 | GO:0005576, GO:0008810, GO:0030245,<br>GO:0071555 |
| U054125    | 764    | -                                                                                    | 90.18  | 0.43 | -7.19               | 7.92E-04 | -                                                 |
| U094550    | 677    | -                                                                                    | 55.11  | 0.26 | -7.19               | 4.50E-03 | -                                                 |

| Unigene ID | Length | Description                                                                                                                            | FPKM   |      | Log <sub>2</sub> FC | P-value  | Gene ontology                                                             |
|------------|--------|----------------------------------------------------------------------------------------------------------------------------------------|--------|------|---------------------|----------|---------------------------------------------------------------------------|
|            |        |                                                                                                                                        | NW     | AD   |                     |          |                                                                           |
| U058205    | 2,240  | Nuclear pore complex protein NUP107<br>{ECO:0000303 PubMed:21189294}<br>[Source:SWISS;ACC:Q8L748]                                      | 19.22  | 0.09 | -7.09               | 1.37E-03 | GO:0005635, GO:0005643, GO:0006810                                        |
| U040819    | 1,650  | DEAD-box ATP-dependent RNA<br>helicase 46<br>[Source:SWISS;ACC:Q9LYJ9]                                                                 | 156.12 | 0.78 | -7.02               | 6.10E-05 | GO:0003723, GO:0005524, GO:0008026                                        |
| U014899    | 2,578  | Dammarenediol II synthase<br>[Source:SWISS;ACC:Q08IT1]                                                                                 | 16.67  | 0.08 | -6.99               | 1.29E-03 | GO:0016021, GO:0016829, GO:0016866                                        |
| U040893    | 718    | -                                                                                                                                      | 253.03 | 1.42 | -6.95               | 1.43E-04 | -                                                                         |
| U015618    | 1,916  | Cyclin-A2-1<br>[Source:SWISS;ACC:Q39071]                                                                                               | 33.42  | 0.18 | -6.92               | 5.94E-04 | GO:0000079, GO:0005634, GO:0007049,<br>GO:0051301                         |
| U027385    | 1,021  | F-box protein GID2<br>[Source:SWISS;ACC:Q9STX3]                                                                                        | 153.69 | 0.85 | -6.92               | 1.31E-04 | GO:0005634, GO:0009740, GO:0009845,<br>GO:0010162, GO:0016567, GO:0019005 |
| U036450    | 1,631  | Malonyl-coenzyme A:anthocyanin 3-O-<br>glucoside-6"-O-malonyltransferase<br>{ECO:0000303 PubMed:12481098}<br>[Source:SWISS;ACC:Q8GSN8] | 41.36  | 0.23 | -6.86               | 5.49E-04 | GO:0009698, GO:0033809                                                    |
| U061875    | 1,171  | Secoisolariciresinol dehydrogenase<br>[Source:SWISS;ACC:Q94KL8]                                                                        | 238.94 | 1.45 | -6.77               | 8.97E-05 | GO:0000166, GO:0016491                                                    |
| U030015    | 1,698  | Putative UPF0481 protein At3g02645<br>[Source:SWISS;ACC:POC897]                                                                        | 23.24  | 0.14 | -6.76               | 2.16E-03 | GO:0016021                                                                |

| Unigene ID | Length | Description                                                                                     | FPKM   |      | Log <sub>2</sub> FC | P-value  | Gene ontology                                                                                                                                                                      |
|------------|--------|-------------------------------------------------------------------------------------------------|--------|------|---------------------|----------|------------------------------------------------------------------------------------------------------------------------------------------------------------------------------------|
|            |        |                                                                                                 | NW     | AD   |                     |          |                                                                                                                                                                                    |
| U023082    | 1,295  | 50S ribosomal protein L17<br>{ECO:0000255 HAMAP-<br>Rule:MF_01368}<br>[Source:SWISS;ACC:A0L5Z9] | 67.84  | 0.48 | -6.54               | 5.66E-04 | GO:0003735, GO:0005840, GO:0006412                                                                                                                                                 |
| U012620    | 594    | Cytochrome c oxidase subunit 6a,<br>mitochondrial<br>[Source:SWISS;ACC:Q9U070]                  | 265.8  | 2.08 | -6.5                | 3.85E-04 | GO:0004129, GO:0005739, GO:0005751                                                                                                                                                 |
| U061943    | 965    | Acid phosphatase 1<br>[Source:SWISS;ACC:P27061]                                                 | 501.33 | 4.11 | -6.35               | 1.59E-04 | GO:0003993                                                                                                                                                                         |
| U003068    | 643    | Cysteine proteinase inhibitor 6<br>[Source:SWISS;ACC:Q8H0X6]                                    | 166.43 | 1.45 | -6.34               | 8.84E-04 | GO:0004869, GO:0005576, GO:0005783,<br>GO:0005829, GO:0006952, GO:0006972,<br>GO:0006979, GO:0009409, GO:0009414,<br>GO:0010951, GO:0050897                                        |
| U030941    | 1,760  | CRAL-TRIO domain-containing protein<br>C23B6.04c<br>[Source:SWISS;ACC:Q9UU99]                   | 21.9   | 0.2  | -6.17               | 3.65E-03 | GO:0005886, GO:0006696, GO:0008526,<br>GO:0015914                                                                                                                                  |
| U040169    | 1,710  | Uncharacterized acetyltransferase<br>At3g50280<br>[Source:SWISS;ACC:Q9SND9]                     | 36.97  | 0.36 | -6.05               | 1.43E-03 | GO:0016747                                                                                                                                                                         |
| U022274    | 1,490  | Gamma carbonic anhydrase 2,<br>mitochondrial<br>[Source:SWISS;ACC:Q9C6B3]                       | 71.81  | 0.71 | -6.04               | 7.36E-04 | GO:0004089, GO:0005739, GO:0005747,<br>GO:0009507, GO:0009651, GO:0009853,<br>GO:0009901, GO:0016020, GO:0031966,<br>GO:0042802, GO:0045271, GO:0046872,<br>GO:0070207, GO:2000377 |



| Unigene ID | Length | Description                                                                                          | FPKM   |      | Log <sub>2</sub> FC | P-value  | Gene ontology                                                                                        |
|------------|--------|------------------------------------------------------------------------------------------------------|--------|------|---------------------|----------|------------------------------------------------------------------------------------------------------|
|            |        |                                                                                                      | NW     | AD   |                     |          |                                                                                                      |
| U000039    | 1,728  | 3-ketoacyl-CoA synthase 17<br>[Source:SWISS;ACC:Q5XEP9]                                              | 60.37  | 0.61 | -6.01               | 7.20E-04 | GO:0006633, GO:0006970, GO:0009611,<br>GO:0009922, GO:0010345, GO:0016021                            |
| U025273    | 2,014  | Importin subunit alpha-1a<br>[Source:SWISS;ACC:Q71VM4]                                               | 25.71  | 0.26 | -6.01               | 2.57E-03 | GO:0005634, GO:0006606, GO:0008565,<br>GO:0016032, GO:0048471                                        |
| U015711    | 674    | Basic blue protein<br>[Source:SWISS;ACC:P00303]                                                      | 140.33 | 1.59 | -5.95               | 1.63E-03 | GO:0005507, GO:0009055, GO:0055114                                                                   |
| U022396    | 1,820  | Pentatricopeptide repeat-containing<br>protein At1g62670, mitochondrial<br>[Source:SWISS;ACC:Q9SXD1] | 78.33  | 0.82 | -5.95               | 5.24E-04 | GO:0000966, GO:0003723, GO:0005739                                                                   |
| U021839    | 2,000  | Serine carboxypeptidase-like 16<br>[Source:SWISS;ACC:Q9C7D4]                                         | 383.02 | 4.29 | -5.85               | 5.29E-04 | GO:0004185, GO:0005576                                                                               |
| U008278    | 1,043  | Mini zinc finger protein 2<br>[Source:SWISS;ACC:Q9LJW5]                                              | 140.23 | 1.83 | -5.67               | 8.99E-04 | GO:0003677, GO:0005634, GO:0005737,<br>GO:0006351, GO:0006355, GO:0007275,<br>GO:0042803, GO:0046872 |
| U025275    | 2,115  | Importin subunit alpha-1a<br>[Source:SWISS;ACC:Q71VM4]                                               | 159.49 | 2.1  | -5.61               | 5.55E-04 | GO:0005634, GO:0006606, GO:0008565,<br>GO:0016032, GO:0048471                                        |
| U043660    | 1,775  | -                                                                                                    | 33.12  | 0.51 | -5.39               | 3.87E-03 | -                                                                                                    |
| U091542    | 614    | -                                                                                                    | 130.05 | 2.22 | -5.38               | 4.62E-03 | -                                                                                                    |
| U054347    | 2,353  | Protein MOR1<br>[Source:SWISS;ACC:Q5N749]                                                            | 54.96  | 0.88 | -5.32               | 1.43E-03 | GO:0005737, GO:0005874                                                                               |

| Unigene ID | Length | Description                                                                                 | FPKM   |      | Log <sub>2</sub> FC | P-value  | Gene ontology                                                                                                                                                                                                                                                                                                                                                             |
|------------|--------|---------------------------------------------------------------------------------------------|--------|------|---------------------|----------|---------------------------------------------------------------------------------------------------------------------------------------------------------------------------------------------------------------------------------------------------------------------------------------------------------------------------------------------------------------------------|
|            |        |                                                                                             | NW     | AD   |                     |          |                                                                                                                                                                                                                                                                                                                                                                           |
| U020751    | 1,932  | Flavonoid 3'-monooxygenase<br>[Source:SWISS;ACC:Q9SBQ9]                                     | 132.27 | 2.64 | -5.01               | 1.56E-03 | GO:0005506, GO:0005789, GO:0009813,<br>GO:0016021, GO:0016711, GO:0020037                                                                                                                                                                                                                                                                                                 |
| U020721    | 2,948  | ABC transporter G family member 39<br>[Source:SWISS;ACC:Q7PC84]                             | 23.68  | 0.48 | -4.98               | 4.24E-03 | GO:0000302, GO:0005524, GO:0005886,<br>GO:0006855, GO:0016021, GO:0016887                                                                                                                                                                                                                                                                                                 |
| U041526    | 1,024  | Bifunctional epoxide hydrolase 2<br>[Source:SWISS;ACC:P34913]                               | 180.31 | 3.89 | -4.95               | 2.20E-03 | GO:0000287, GO:0004301, GO:0005102,<br>GO:0005777, GO:0005829, GO:0006805,<br>GO:0006874, GO:0006954, GO:0008217,<br>GO:0009636, GO:0010628, GO:0015643,<br>GO:0016311, GO:0016791, GO:0017144,<br>GO:0019369, GO:0019373, GO:0033885,<br>GO:0042577, GO:0042632, GO:0042803,<br>GO:0044281, GO:0045909, GO:0046272,<br>GO:0046839, GO:0070062, GO:0072593,<br>GO:0090181 |
| U050035    | 2,290  | Putative 12-oxophytodienoate reductase<br>11 [Source:SWISS;ACC:B9FSC8]                      | 55.52  | 1.16 | -4.95               | 2.53E-03 | GO:0010181, GO:0016491, GO:0031408                                                                                                                                                                                                                                                                                                                                        |
| U025082    | 2,397  | -                                                                                           | 54.98  | 1.15 | -4.94               | 2.43E-03 | -                                                                                                                                                                                                                                                                                                                                                                         |
| U056322    | 4,353  | Auxin response factor 5<br>[Source:SWISS;ACC:Q6Z2W3]                                        | 20.66  | 0.45 | -4.87               | 3.67E-03 | GO:0003677, GO:0005634, GO:0006351,<br>GO:0006355, GO:0009734                                                                                                                                                                                                                                                                                                             |
| U051204    | 2,443  | Subtilisin-like protease SDD1<br>{ECO:0000303 PubMed:10809670}<br>[Source:SWISS;ACC:O64495] | 45.77  | 1.03 | -4.84               | 3.31E-03 | GO:0004252, GO:0005618, GO:0008152,<br>GO:0009897, GO:0010103, GO:0042127,<br>GO:0048046                                                                                                                                                                                                                                                                                  |

| Unigene ID | Length | Description                                                                              | FPKM   |        | Log <sub>2</sub> FC | P-value  | Gene ontology                                                                                                                                                                      |
|------------|--------|------------------------------------------------------------------------------------------|--------|--------|---------------------|----------|------------------------------------------------------------------------------------------------------------------------------------------------------------------------------------|
|            |        |                                                                                          | NW     | AD     |                     |          |                                                                                                                                                                                    |
| U020331    | 2,031  | UDP-glycosyltransferase 76C1<br>[Source:SWISS;ACC:Q9FI99]                                | 173.53 | 4.04   | -4.79               | 2.19E-03 | GO:0047807, GO:0080062                                                                                                                                                             |
| U030165    | 1,794  | Protein<br>TRIGALACTOSYLDIACYLGLYCER<br>OL 4, chloroplastic<br>[Source:SWISS;ACC:Q9M903] | 57.95  | 1.36   | -4.79               | 3.95E-03 | GO:0005783, GO:0009507, GO:0009536,<br>GO:0009707, GO:0009941, GO:0016020,<br>GO:0016021, GO:0034196, GO:0042803,<br>GO:0070300, GO:1990052                                        |
| U050362    | 1,604  | F-box protein At2g21930<br>[Source:SWISS;ACC:Q9SJ06]                                     | 80.77  | 2.07   | -4.67               | 4.00E-03 | -                                                                                                                                                                                  |
| U038233    | 1,141  | Ethylene-responsive transcription factor<br>RAP2-3 [Source:SWISS;ACC:P42736]             | 118.41 | 3.23   | -4.6                | 4.59E-03 | GO:0003677, GO:0003700, GO:0005634,<br>GO:0005737, GO:0005886, GO:0006351,<br>GO:0008219, GO:0009723, GO:0009735,<br>GO:0009753, GO:0009873, GO:0010286,<br>GO:0045893, GO:0051707 |
| U059241    | 1,338  | GDSL esterase/lipase At2g30310<br>[Source:SWISS;ACC:O22927]                              | 143.7  | 3.91   | -4.59               | 3.58E-03 | GO:0005576, GO:0016042, GO:0016788                                                                                                                                                 |
| U036207    | 1,292  | F-box/kelch-repeat protein At3g06240<br>[Source:SWISS;ACC:Q8GXC7]                        | 160.56 | 4.97   | -4.41               | 4.65E-03 | -                                                                                                                                                                                  |
| U057020    | 3,430  | BAG family molecular chaperone<br>regulator 6<br>[Source:SWISS;ACC:O82345]               | 2      | 30.36  | 4.57                | 3.67E-03 | GO:0005516, GO:0009408, GO:0009506,<br>GO:0009644, GO:0010228, GO:0012502,<br>GO:0042542, GO:0050832                                                                               |
| U026287    | 830    | Probable calcium-binding protein<br>CML49<br>[Source:SWISS;ACC:Q8W4L0]                   | 8.93   | 145.85 | 4.58                | 4.06E-03 | GO:0005509                                                                                                                                                                         |

| Unigene ID | Length | Description                                                      | FPKM  |        | Log <sub>2</sub> FC | P-value  | Gene ontology                                                                                                                   |
|------------|--------|------------------------------------------------------------------|-------|--------|---------------------|----------|---------------------------------------------------------------------------------------------------------------------------------|
|            |        |                                                                  | NW    | AD     |                     |          |                                                                                                                                 |
| U033988    | 1,798  | Cytochrome P450 86B1<br>[Source:SWISS;ACC:Q9FMY1]                | 1.71  | 30.85  | 4.8                 | 4.54E-03 | GO:0004497, GO:0005506, GO:0005783,<br>GO:0005789, GO:0010345, GO:0016021,<br>GO:0016705, GO:0020037, GO:0042761,<br>GO:0071555 |
| U034715    | 565    | Osmotin-like protein<br>[Source:SWISS;ACC:Q41350]                | 8.06  | 169.37 | 4.87                | 4.38E-03 | GO:0000911, GO:0005576, GO:0009505,<br>GO:0009506, GO:0009664, GO:0042545                                                       |
| U020714    | 638    | Non-specific lipid-transfer protein<br>[Source:SWISS;ACC:O04004] | 40.51 | 854.81 | 4.91                | 1.99E-03 | GO:0006869, GO:0008289                                                                                                          |
| U030567    | 719    | Glutaredoxin-C6<br>[Source:SWISS;ACC:Q8L9S3]                     | 13.95 | 299.58 | 4.95                | 1.74E-03 | GO:0005737, GO:0009055, GO:0015035,<br>GO:0045454                                                                               |
| U012168    | 599    | -                                                                | 6.99  | 157.92 | 4.99                | 3.46E-03 | -                                                                                                                               |
| U010258    | 506    | -                                                                | 7.89  | 185.52 | 5.02                | 4.11E-03 | -                                                                                                                               |
| U025332    | 1,401  | -                                                                | 0.91  | 23.76  | 5.32                | 4.88E-03 | -                                                                                                                               |
| U024030    | 755    | Copper transporter 6<br>[Source:SWISS;ACC:Q8GWP3]                | 3.3   | 104.57 | 5.52                | 1.65E-03 | GO:0005375, GO:0005773, GO:0016021                                                                                              |
| U020931    | 1,701  | Cytochrome P450 71A1<br>[Source:SWISS;ACC:P24465]                | 1.11  | 33.98  | 5.56                | 1.51E-03 | GO:0004497, GO:0005506, GO:0005789,<br>GO:0009835, GO:0016021, GO:0016705,<br>GO:0020037                                        |
| U015695    | 645    | -                                                                | 1.77  | 62.46  | 5.65                | 4.88E-03 | -                                                                                                                               |
| U021974    | 762    | -                                                                | 1.34  | 48.13  | 5.71                | 4.34E-03 | -                                                                                                                               |

| Unigene ID | Length | Description                                                                                     | FPKM  |        | Log <sub>2</sub> FC | P-value  | Gene ontology                                                          |
|------------|--------|-------------------------------------------------------------------------------------------------|-------|--------|---------------------|----------|------------------------------------------------------------------------|
|            |        |                                                                                                 | NW    | AD     |                     |          |                                                                        |
| U027717    | 1,248  | 1-aminocyclopropane-1-carboxylate oxidase<br>[Source:SWISS;ACC:A6BM06]                          | 0.72  | 26.92  | 5.84                | 2.55E-03 | GO:0005506, GO:0009693, GO:0009815, GO:0016706                         |
| U022675    | 763    | -                                                                                               | 2.48  | 99.81  | 5.87                | 1.07E-03 | -                                                                      |
| U019712    | 589    | -                                                                                               | 1.49  | 63.95  | 5.92                | 4.97E-03 | -                                                                      |
| U039580    | 1,146  | -                                                                                               | 0.82  | 32.86  | 5.92                | 2.38E-03 | -                                                                      |
| U034731    | 940    | -                                                                                               | 0.69  | 28.39  | 5.94                | 4.97E-03 | -                                                                      |
| U052726    | 575    | -                                                                                               | 9.66  | 440.43 | 6                   | 3.18E-04 | -                                                                      |
| U014030    | 502    | -                                                                                               | 11.14 | 564.71 | 6.13                | 2.65E-04 | -                                                                      |
| U035174    | 650    | Squamosa promoter-binding-like protein 12<br>[Source:SWISS;ACC:Q9S7P5]                          | 4.95  | 253.45 | 6.19                | 3.01E-04 | GO:0003677, GO:0003700, GO:0005634, GO:0006351, GO:0006355, GO:0046872 |
| U062665    | 902    | -                                                                                               | 1.34  | 66.99  | 6.21                | 8.30E-04 | -                                                                      |
| U040895    | 858    | -                                                                                               | 0.67  | 35.34  | 6.28                | 2.86E-03 | -                                                                      |
| U019619    | 1,259  | G-type lectin S-receptor-like serine/threonine-protein kinase RLK1<br>[Source:SWISS;ACC:Q39202] | 0.38  | 19.57  | 6.3                 | 3.22E-03 | GO:0004674, GO:0005516, GO:0005524, GO:0005886, GO:0016021, GO:0030246 |

| Unigene ID | Length | Description                                                                       | FPKM |        | Log <sub>2</sub> FC | P-value  | Gene ontology          |
|------------|--------|-----------------------------------------------------------------------------------|------|--------|---------------------|----------|------------------------|
|            |        |                                                                                   | NW   | AD     |                     |          |                        |
| U082064    | 810    | -                                                                                 | 3.14 | 179.15 | 6.38                | 2.09E-04 | -                      |
| U037951    | 542    | Non-functional NADPH-dependent codeinone reductase 2<br>[Source:SWISS;ACC:Q9SQ64] | 1.27 | 76.89  | 6.4                 | 3.58E-03 | GO:0005829, GO:0016491 |
| U090030    | 1,085  | -                                                                                 | 0.34 | 19.4   | 6.4                 | 4.56E-03 | -                      |
| U021945    | 616    | -                                                                                 | 0.84 | 51.47  | 6.43                | 3.95E-03 | -                      |
| U029679    | 888    | -                                                                                 | 1.77 | 103.34 | 6.43                | 3.42E-04 | -                      |
| U014619    | 1,002  | -                                                                                 | 0.48 | 28.25  | 6.44                | 2.77E-03 | -                      |
| U017338    | 535    | -                                                                                 | 10.8 | 686.74 | 6.46                | 1.29E-04 | -                      |
| U032087    | 1,698  | WAT1-related protein At4g19185<br>[Source:SWISS;ACC:Q8W4R9]                       | 0.43 | 25.33  | 6.5                 | 7.96E-04 | GO:0005794, GO:0016021 |
| U003618    | 538    | -                                                                                 | 1.42 | 93.2   | 6.51                | 1.97E-03 | -                      |
| U056309    | 1,141  | -                                                                                 | 0.54 | 38.92  | 6.77                | 6.28E-04 | -                      |
| U002410    | 933    | -                                                                                 | 9.06 | 677.19 | 6.8                 | 1.10E-04 | -                      |
| U019152    | 661    | F-box/kelch-repeat protein At1g26930<br>[Source:SWISS;ACC:Q84M94]                 | 0.72 | 56.32  | 6.81                | 1.85E-03 | GO:0005634, GO:0005777 |

| Unigene ID | Length | Description                                                      | FPKM  |             | Log <sub>2</sub> FC | P-value  | Gene ontology                                                                            |
|------------|--------|------------------------------------------------------------------|-------|-------------|---------------------|----------|------------------------------------------------------------------------------------------|
|            |        |                                                                  | NW    | AD          |                     |          |                                                                                          |
| U035082    | 816    | Transcription factor ORG3<br>[Source:SWISS;ACC:Q9M1K0]           | 0.69  | 55.04       | 6.87                | 7.89E-04 | GO:0003677, GO:0003700, GO:0005634,<br>GO:0006351, GO:0006355, GO:0010106,<br>GO:0055072 |
| U014292    | 705    | -                                                                | 4.77  | 397.23      | 6.91                | 6.16E-05 | -                                                                                        |
| U055211    | 851    | Miraculin<br>[Source:SWISS;ACC:P13087]                           | 0.32  | 27.43       | 6.97                | 3.16E-03 | GO:0004866                                                                               |
| U037831    | 720    | -                                                                | 0.5   | 48.28       | 7.12                | 1.16E-03 | -                                                                                        |
| U018264    | 1,068  | -                                                                | 0.27  | 26.34       | 7.17                | 1.10E-03 | -                                                                                        |
| U028470    | 647    | -                                                                | 1     | 107.6       | 7.25                | 2.93E-04 | -                                                                                        |
| U026215    | 1,237  | Caffeic acid 3-O-methyltransferase<br>[Source:SWISS;ACC:P28002]  | 0.19  | 19.63       | 7.27                | 1.53E-03 | GO:0009809, GO:0047763                                                                   |
| U055418    | 507    | -                                                                | 1.31  | 148.4       | 7.28                | 3.94E-04 | -                                                                                        |
| U083315    | 598    | Non-specific lipid-transfer protein<br>[Source:SWISS;ACC:O04004] | 2.31  | 265.04      | 7.33                | 6.17E-05 | GO:0006869, GO:0008289                                                                   |
| U099116    | 633    | -                                                                | 8.87  | 1067.2<br>1 | 7.42                | 3.23E-05 | -                                                                                        |
| U012257    | 1,297  | -                                                                | 29.99 | 3720.3<br>6 | 7.56                | 3.83E-03 | -                                                                                        |

| Unigene ID | Length | Description                                                                     | FPKM  |         | Log <sub>2</sub> FC | P-value  | Gene ontology                                                                      |
|------------|--------|---------------------------------------------------------------------------------|-------|---------|---------------------|----------|------------------------------------------------------------------------------------|
|            |        |                                                                                 | NW    | AD      |                     |          |                                                                                    |
| U017647    | 734    | -                                                                               | 29.86 | 3904.8  | 7.56                | 4.60E-04 | -                                                                                  |
| U064367    | 864    | -                                                                               | 0.79  | 102.24  | 7.58                | 7.66E-05 | -                                                                                  |
| U057529    | 1,528  | Probable disease resistance protein At1g61180<br>[Source:SWISS;ACC:Q940K0]      | 0.36  | 47.14   | 7.65                | 7.05E-05 | GO:0005524, GO:0006952, GO:0043531                                                 |
| U080025    | 583    | -                                                                               | 1.82  | 274.27  | 7.72                | 3.73E-05 | -                                                                                  |
| U046731    | 830    | -                                                                               | 0.17  | 25      | 7.77                | 2.79E-03 | -                                                                                  |
| U003323    | 1,145  | (+)-pulegone reductase<br>[Source:SWISS;ACC:Q6WAU0]                             | 0.11  | 15.5    | 7.78                | 2.79E-03 | GO:0005737, GO:0008270, GO:0016114, GO:0042214, GO:0052579, GO:0052580, GO:0070402 |
| U059946    | 1,865  | Geraniol 8-hydroxylase<br>[Source:SWISS;ACC:Q8VWZ7]                             | 1.7   | 242.44  | 7.79                | 1.93E-05 | GO:0005506, GO:0005789, GO:0016021, GO:0016099, GO:0016709, GO:0020037             |
| U022500    | 844    | -                                                                               | 0.33  | 53.06   | 7.9                 | 2.97E-04 | -                                                                                  |
| U017648    | 730    | -                                                                               | 20.05 | 3352.05 | 7.92                | 1.98E-04 | -                                                                                  |
| U019322    | 581    | Probable non-specific lipid-transfer protein AKCS9<br>[Source:SWISS;ACC:Q43681] | 9.72  | 1705.88 | 7.94                | 1.95E-05 | GO:0006810, GO:0008289                                                             |



| Unigene ID | Length | Description                                                         | FPKM |        | Log <sub>2</sub> FC | P-value  | Gene ontology                                                                                        |
|------------|--------|---------------------------------------------------------------------|------|--------|---------------------|----------|------------------------------------------------------------------------------------------------------|
|            |        |                                                                     | NW   | AD     |                     |          |                                                                                                      |
| U012135    | 1,116  | GDSL esterase/lipase At5g55050<br>[Source:SWISS;ACC:Q9FIA1]         | 0.11 | 19.28  | 8.04                | 1.46E-03 | GO:0005576, GO:0016042, GO:0016298                                                                   |
| U029636    | 731    | -                                                                   | 0.2  | 37.61  | 8.06                | 1.40E-03 | -                                                                                                    |
| U030041    | 1,426  | Replication protein A 14 kDa subunit B<br>[Source:SWISS;ACC:Q6NLG7] | 0.13 | 22.93  | 8.06                | 4.25E-04 | GO:0003677, GO:0005634, GO:0006260,<br>GO:0006281, GO:0006310                                        |
| U008946    | 766    | -                                                                   | 1.14 | 211.23 | 8.08                | 1.56E-05 | -                                                                                                    |
| U023147    | 709    | -                                                                   | 0.21 | 40.76  | 8.09                | 1.28E-03 | -                                                                                                    |
| U002180    | 825    | -                                                                   | 0.17 | 31.64  | 8.1                 | 1.25E-03 | -                                                                                                    |
| U082888    | 577    | -                                                                   | 1.24 | 243.92 | 8.11                | 2.99E-05 | -                                                                                                    |
| U047288    | 611    | -                                                                   | 0.56 | 111.23 | 8.14                | 1.52E-04 | -                                                                                                    |
| U019020    | 558    | -                                                                   | 1.32 | 271.59 | 8.16                | 2.59E-05 | -                                                                                                    |
| U031040    | 788    | Protein TIFY 10A<br>[Source:SWISS;ACC:Q9LMA8]                       | 0.4  | 78.62  | 8.17                | 9.64E-05 | GO:0005634, GO:0006351, GO:0006355,<br>GO:0009555, GO:0009753, GO:0009867,<br>GO:0009908, GO:0042742 |
| U031336    | 685    | -                                                                   | 0.23 | 46.09  | 8.18                | 1.02E-03 | -                                                                                                    |
| U000117    | 805    | Mannose/glucose-specific lectin<br>[Source:SWISS;ACC:P83304]        | 1.58 | 336.57 | 8.28                | 6.66E-06 | GO:0000771, GO:0005536, GO:0005537                                                                   |

| Unigene ID | Length | Description                                                                                                            | FPKM |        | Log <sub>2</sub> FC | P-value  | Gene ontology                                                                                                    |
|------------|--------|------------------------------------------------------------------------------------------------------------------------|------|--------|---------------------|----------|------------------------------------------------------------------------------------------------------------------|
|            |        |                                                                                                                        | NW   | AD     |                     |          |                                                                                                                  |
| U015407    | 982    | Bidirectional sugar transporter<br>SWEET7b<br>[Source:SWISS;ACC:Q0J349]                                                | 0.13 | 28.01  | 8.31                | 7.26E-04 | GO:0005887, GO:0034219, GO:0051119                                                                               |
| U017583    | 651    | -                                                                                                                      | 0.25 | 55.16  | 8.31                | 7.40E-04 | -                                                                                                                |
| U032925    | 1,248  | -                                                                                                                      | 0.19 | 42.27  | 8.39                | 7.57E-05 | -                                                                                                                |
| U022674    | 2,005  | -                                                                                                                      | 0.64 | 144.37 | 8.44                | 4.99E-06 | -                                                                                                                |
| U019858    | 763    | Polyubiquitin 11<br>[Source:SWISS;ACC:P0CH33]                                                                          | 0.57 | 138.92 | 8.46                | 2.19E-05 | GO:0005634, GO:0005737, GO:0006511                                                                               |
| U045981    | 808    | Endoglucanase<br>[Source:SWISS;ACC:P22503]                                                                             | 0.17 | 44.51  | 8.54                | 3.94E-04 | GO:0008810, GO:0009835, GO:0030245                                                                               |
| U035032    | 1,403  | Probable dolichyl-<br>diphosphooligosaccharide--protein<br>glycosyltransferase subunit 3B<br>[Source:SWISS;ACC:Q9SYB5] | 0.28 | 67.98  | 8.55                | 1.12E-05 | GO:0005783, GO:0005886, GO:0006487,<br>GO:0008250, GO:0009507, GO:0016021                                        |
| U014753    | 2,462  | Zinc finger CCCH domain-containing<br>protein 19<br>[Source:SWISS;ACC:Q9SIV5]                                          | 0.05 | 11.89  | 8.57                | 2.12E-04 | GO:0003677, GO:0005634, GO:0006352,<br>GO:0008270, GO:0010964, GO:0016570,<br>GO:0031047, GO:0032776, GO:0042393 |
| U043800    | 1,078  | -                                                                                                                      | 0.12 | 31.59  | 8.68                | 2.71E-04 | -                                                                                                                |
| U009822    | 677    | -                                                                                                                      | 0.23 | 79.7   | 8.94                | 1.31E-04 | -                                                                                                                |

| Unigene ID | Length | Description                                                       | FPKM |        | Log <sub>2</sub> FC | P-value  | Gene ontology                                                             |
|------------|--------|-------------------------------------------------------------------|------|--------|---------------------|----------|---------------------------------------------------------------------------|
|            |        |                                                                   | NW   | AD     |                     |          |                                                                           |
| U002745    | 832    | Agglutinin<br>[Source:SWISS;ACC:P82859]                           | 2.51 | 860.89 | 8.98                | 3.61E-06 | GO:0005537, GO:0008061, GO:0051781                                        |
| U009402    | 1,391  | -                                                                 | 0.08 | 28.58  | 9.03                | 1.01E-04 | -                                                                         |
| U022677    | 1,687  | -                                                                 | 0.26 | 89.51  | 9.03                | 3.06E-06 | -                                                                         |
| U000155    | 579    | -                                                                 | 1.83 | 716.77 | 9.1                 | 1.91E-06 | -                                                                         |
| U008729    | 628    | Non-specific lipid-transfer protein<br>[Source:SWISS;ACC:Q39950]  | 0.26 | 119.36 | 9.32                | 4.43E-05 | GO:0006869, GO:0008289                                                    |
| U013787    | 558    | -                                                                 | 0.99 | 519.24 | 9.51                | 1.61E-06 | -                                                                         |
| U014343    | 518    | Cysteine proteinase inhibitor 5<br>[Source:SWISS;ACC:Q41916]      | 1.16 | 611.84 | 9.51                | 1.60E-06 | GO:0004869, GO:0005576, GO:0005618,<br>GO:0006952                         |
| U013786    | 1,222  | GTP-binding nuclear protein Ran2<br>[Source:SWISS;ACC:P38547]     | 0.2  | 94.95  | 9.52                | 3.46E-06 | GO:0003924, GO:0005525, GO:0005634,<br>GO:0006886, GO:0006913, GO:0007264 |
| U036205    | 1,261  | F-box/kelch-repeat protein At3g06240<br>[Source:SWISS;ACC:Q8GXC7] | 0.19 | 97.93  | 9.6                 | 2.64E-06 | -                                                                         |
| U040561    | 6,830  | -                                                                 | 0.01 | 7.43   | 9.69                | 1.51E-05 | -                                                                         |
| U052844    | 1,601  | Luminal-binding protein 5<br>[Source:SWISS;ACC:Q03685]            | 0.07 | 44.47  | 9.93                | 7.70E-06 | GO:0005524, GO:0005788                                                    |

| Unigene ID | Length | Description                                                                        | FPKM |        | Log <sub>2</sub> FC | P-value  | Gene ontology                                                 |
|------------|--------|------------------------------------------------------------------------------------|------|--------|---------------------|----------|---------------------------------------------------------------|
|            |        |                                                                                    | NW   | AD     |                     |          |                                                               |
| U017430    | 1,717  | Cytochrome P450 71A4<br>[Source:SWISS;ACC:P37117]                                  | 0.06 | 43.51  | 10                  | 5.92E-06 | GO:0004497, GO:0005506, GO:0016021,<br>GO:0016705, GO:0020037 |
| U002822    | 714    | Protein RALF-like 24<br>[Source:SWISS;ACC:Q9LK37]                                  | 0.42 | 317    | 10.1                | 9.13E-07 | GO:0004871, GO:0005179, GO:0007267,<br>GO:0019722, GO:0048046 |
| U004468    | 1,537  | Uncharacterized mitochondrial protein<br>AtMg00300<br>[Source:SWISS;ACC:P93293]    | 0.07 | 57.17  | 10.2                | 3.43E-06 | GO:0005739                                                    |
| U021595    | 7,313  | -                                                                                  | 0.04 | 29.08  | 10.2                | 4.56E-07 | -                                                             |
| U024128    | 602    | Probable non-specific lipid-transfer<br>protein AKCS9<br>[Source:SWISS;ACC:Q43681] | 0.13 | 105.61 | 10.2                | 3.37E-05 | GO:0006810, GO:0008289                                        |
| U081210    | 612    | -                                                                                  | 0.28 | 262.51 | 10.4                | 2.18E-06 | -                                                             |
| U085276    | 1,160  | -                                                                                  | 0.38 | 329.45 | 10.4                | 4.12E-07 | -                                                             |
| U021962    | 3,008  | -                                                                                  | 0.03 | 39.03  | 10.8                | 7.33E-07 | -                                                             |
| U024662    | 636    | -                                                                                  | 0.04 | 53.65  | 10.8                | 3.58E-04 | -                                                             |
| U028558    | 4,699  | -                                                                                  | 0.04 | 54.96  | 11                  | 1.71E-07 | -                                                             |
| U016597    | 3,053  | -                                                                                  | 0.03 | 45.92  | 11.1                | 4.00E-07 | -                                                             |

| Unigene ID | Length | Description                                                                                          | FPKM |             | Log <sub>2</sub> FC | P-value  | Gene ontology                                                             |
|------------|--------|------------------------------------------------------------------------------------------------------|------|-------------|---------------------|----------|---------------------------------------------------------------------------|
|            |        |                                                                                                      | NW   | AD          |                     |          |                                                                           |
| U000795    | 1,018  | ABC transporter E family member 2<br>[Source:SWISS;ACC:Q8LPJ4]                                       | 0.13 | 196.42      | 11.2                | 3.01E-07 | GO:0005215, GO:0005524, GO:0016020,<br>GO:0016887, GO:0046872, GO:0051539 |
| U035373    | 5,485  | -                                                                                                    | 0.02 | 26.65       | 11.2                | 2.99E-07 | -                                                                         |
| U085275    | 1,141  | -                                                                                                    | 0.26 | 467.69      | 11.4                | 9.34E-08 | -                                                                         |
| U007400    | 748    | -                                                                                                    | 0.39 | 851.3       | 11.6                | 9.68E-08 | -                                                                         |
| U048305    | 9,157  | -                                                                                                    | 0.01 | 20.16       | 11.6                | 1.45E-07 | -                                                                         |
| U019851    | 2,261  | Probable metal-nicotianamine<br>transporter YSL7<br>[Source:SWISS;ACC:Q9SHY2]                        | 0.01 | 11.87       | 11.7                | 1.09E-04 | GO:0005886, GO:0016021, GO:0055085                                        |
| U036202    | 858    | -                                                                                                    | 0.16 | 373.93      | 11.8                | 1.07E-07 | -                                                                         |
| U037701    | 14,481 | -                                                                                                    | 0.01 | 29.91       | 11.8                | 8.86E-08 | -                                                                         |
| U030773    | 523    | Pentatricopeptide repeat-containing<br>protein At1g29710, mitochondrial<br>[Source:SWISS;ACC:Q9C6G2] | 0.43 | 1282.7<br>8 | 12                  | 5.95E-08 | GO:0005739                                                                |
| U027761    | 986    | -                                                                                                    | 0.13 | 399.76      | 12.2                | 6.23E-08 | -                                                                         |
| U056899    | 1,343  | -                                                                                                    | 0.4  | 1238.1<br>5 | 12.2                | 9.37E-07 | -                                                                         |

| Unigene ID | Length | Description                                                         | FPKM |       | Log <sub>2</sub> FC | P-value  | Gene ontology                                     |
|------------|--------|---------------------------------------------------------------------|------|-------|---------------------|----------|---------------------------------------------------|
|            |        |                                                                     | NW   | AD    |                     |          |                                                   |
| U007413    | 632    | -                                                                   | 0    | 27.23 | 13.8                | 4.75E-03 | -                                                 |
| U029691    | 811    | -                                                                   | 0    | 17.36 | 13.8                | 4.93E-03 | -                                                 |
| U045822    | 1,890  | -                                                                   | 0    | 5.49  | 13.8                | 4.75E-03 | -                                                 |
| U057354    | 529    | Nucleosome assembly protein 1<br>[Source:SWISS;ACC:Q70Z18]          | 0    | 38.86 | 13.8                | 4.93E-03 | GO:0005634, GO:0005737, GO:0006334                |
| U010167    | 604    | -                                                                   | 0    | 31.72 | 13.9                | 3.79E-03 | -                                                 |
| U019602    | 1,264  | -                                                                   | 0    | 9.65  | 13.9                | 3.93E-03 | -                                                 |
| U023801    | 781    | -                                                                   | 0    | 19.67 | 13.9                | 3.93E-03 | -                                                 |
| U025485    | 1,409  | Putative receptor protein kinase ZmPK1<br>[Source:SWISS;ACC:P17801] | 0    | 8.21  | 13.9                | 4.24E-03 | GO:0004674, GO:0005524, GO:0016021,<br>GO:0048544 |
| U026284    | 591    | -                                                                   | 0    | 33.13 | 13.9                | 3.79E-03 | -                                                 |
| U027731    | 886    | Polyubiquitin<br>[Source:SWISS;ACC:P0CG73]                          | 0    | 15.38 | 13.9                | 4.57E-03 | GO:0005634, GO:0005737                            |
| U028668    | 688    | -                                                                   | 0    | 23.5  | 13.9                | 4.57E-03 | -                                                 |
| U031837    | 861    | Transactivator/viroplasm protein<br>[Source:SWISS;ACC:P15628]       | 0    | 16.78 | 13.9                | 3.93E-03 | GO:0006417, GO:0030430                            |

| Unigene ID | Length | Description                                                               | FPKM |       | Log <sub>2</sub> FC | P-value  | Gene ontology                                                                                                                                                                                                                                        |
|------------|--------|---------------------------------------------------------------------------|------|-------|---------------------|----------|------------------------------------------------------------------------------------------------------------------------------------------------------------------------------------------------------------------------------------------------------|
|            |        |                                                                           | NW   | AD    |                     |          |                                                                                                                                                                                                                                                      |
| U034831    | 980    | -                                                                         | 0    | 13.15 | 13.9                | 4.57E-03 | -                                                                                                                                                                                                                                                    |
| U038252    | 925    | APO protein 1, chloroplastic<br>[Source:SWISS;ACC:Q9XIR4]                 | 0    | 15.2  | 13.9                | 3.79E-03 | GO:0003723, GO:0009507                                                                                                                                                                                                                               |
| U048636    | 1,125  | Putative ribonuclease H protein<br>At1g65750<br>[Source:SWISS;ACC:P0C2F6] | 0    | 11.46 | 13.9                | 3.79E-03 | GO:0003676, GO:0004523, GO:0046872                                                                                                                                                                                                                   |
| U060314    | 524    | Cell number regulator 3<br>[Source:SWISS;ACC:D9HP19]                      | 0    | 40.57 | 13.9                | 4.57E-03 | GO:0016021                                                                                                                                                                                                                                           |
| U061467    | 528    | -                                                                         | 0    | 41.19 | 13.9                | 4.08E-03 | -                                                                                                                                                                                                                                                    |
| U076948    | 566    | -                                                                         | 0    | 34.35 | 13.9                | 4.57E-03 | -                                                                                                                                                                                                                                                    |
| U080443    | 2,191  | Adenylate kinase 9<br>[Source:SWISS;ACC:Q5TCS8]                           | 0    | 4.66  | 13.9                | 4.57E-03 | GO:0004550, GO:0005524, GO:0005634,<br>GO:0005730, GO:0005737, GO:0006174,<br>GO:0006186, GO:0006756, GO:0006757,<br>GO:0031965, GO:0050145, GO:0061508,<br>GO:0061565, GO:0061566, GO:0061567,<br>GO:0061568, GO:0061569, GO:0061570,<br>GO:0061571 |
| U083752    | 503    | -                                                                         | 0    | 46.65 | 13.9                | 3.93E-03 | -                                                                                                                                                                                                                                                    |
| U084409    | 569    | -                                                                         | 0    | 34.54 | 13.9                | 4.24E-03 | -                                                                                                                                                                                                                                                    |
| U084859    | 899    | Unconventional myosin-X<br>[Source:SWISS;ACC:P79114]                      | 0    | 15.85 | 13.9                | 3.79E-03 | GO:0001726, GO:0005524, GO:0005547,<br>GO:0005829, GO:0005938, GO:0006200,                                                                                                                                                                           |

| Unigene ID | Length | Description                                                                              | FPKM |       | Log <sub>2</sub> FC | P-value  | Gene ontology                                                                                                                                                          |
|------------|--------|------------------------------------------------------------------------------------------|------|-------|---------------------|----------|------------------------------------------------------------------------------------------------------------------------------------------------------------------------|
|            |        |                                                                                          | NW   | AD    |                     |          |                                                                                                                                                                        |
|            |        |                                                                                          |      |       |                     |          | GO:0008152, GO:0008360, GO:0016459, GO:0030027, GO:0030705, GO:0030898, GO:0031527, GO:0032433, GO:0051015, GO:0051489, GO:0060002                                     |
| U089563    | 974    | -                                                                                        | 0    | 13.73 | 13.9                | 4.08E-03 | -                                                                                                                                                                      |
| U095550    | 1,207  | -                                                                                        | 0    | 9.99  | 13.9                | 4.24E-03 | -                                                                                                                                                                      |
| U018971    | 597    | Bet1-like SNARE 1-1<br>[Source:SWISS;ACC:Q9M2J9]                                         | 0    | 33.66 | 14                  | 3.28E-03 | GO:0000139, GO:0005484, GO:0005634, GO:0005789, GO:0005886, GO:0015031, GO:0016021, GO:0016192                                                                         |
| U020262    | 506    | -                                                                                        | 0    | 49    | 14                  | 3.05E-03 | -                                                                                                                                                                      |
| U020862    | 967    | Nudix hydrolase 22, chloroplastic<br>[Source:SWISS;ACC:O22951]                           | 0    | 14.57 | 14                  | 3.40E-03 | GO:0009507, GO:0016787, GO:0046872                                                                                                                                     |
| U024377    | 960    | Purple acid phosphatase 8<br>[Source:SWISS;ACC:Q8VYZ2]                                   | 0    | 14.79 | 14                  | 3.40E-03 | GO:0003993, GO:0005576, GO:0016311, GO:0046872                                                                                                                         |
| U036811    | 951    | -                                                                                        | 0    | 15.65 | 14                  | 2.94E-03 | -                                                                                                                                                                      |
| U040179    | 605    | -                                                                                        | 0    | 32.59 | 14                  | 3.40E-03 | -                                                                                                                                                                      |
| U052740    | 980    | RING finger and CHY zinc finger domain-containing protein 1<br>[Source:SWISS;ACC:Q96PM5] | 0    | 14.06 | 14                  | 3.65E-03 | GO:0000151, GO:0002039, GO:0004842, GO:0005634, GO:0005737, GO:0008270, GO:0016567, GO:0016607, GO:0016874, GO:0031398, GO:0032436, GO:0042787, GO:0042803, GO:0051865 |



| Unigene ID | Length | Description                                                                                            | FPKM |       | Log <sub>2</sub> FC | P-value  | Gene ontology                                                                                  |
|------------|--------|--------------------------------------------------------------------------------------------------------|------|-------|---------------------|----------|------------------------------------------------------------------------------------------------|
|            |        |                                                                                                        | NW   | AD    |                     |          |                                                                                                |
| U058878    | 1,178  | -                                                                                                      | 0    | 11.26 | 14                  | 3.16E-03 | -                                                                                              |
| U089053    | 582    | -                                                                                                      | 0    | 36.3  | 14                  | 3.05E-03 | -                                                                                              |
| U093099    | 896    | -                                                                                                      | 0    | 16.95 | 14                  | 3.05E-03 | -                                                                                              |
| U095720    | 751    | Probably inactive leucine-rich repeat receptor-like protein kinase At3g28040 [Source:SWISS;ACC:Q9LRT1] | 0    | 22.2  | 14                  | 3.28E-03 | GO:0004672, GO:0005524, GO:0016021                                                             |
| U000317    | 1,386  | -                                                                                                      | 0    | 9.4   | 14.1                | 2.74E-03 | -                                                                                              |
| U011817    | 2,463  | -                                                                                                      | 0    | 4.78  | 14.1                | 2.56E-03 | -                                                                                              |
| U016598    | 1,335  | -                                                                                                      | 0    | 10.46 | 14.1                | 2.23E-03 | -                                                                                              |
| U022226    | 687    | -                                                                                                      | 0    | 28.17 | 14.1                | 2.39E-03 | -                                                                                              |
| U035081    | 869    | Transcription factor ORG2 [Source:SWISS;ACC:Q9M1K1]                                                    | 0    | 19    | 14.1                | 2.39E-03 | GO:0003677, GO:0003700, GO:0005634, GO:0006351, GO:0006355, GO:0010106, GO:0055072             |
| U035399    | 941    | ATP-dependent Clp protease proteolytic subunit 5, chloroplastic [Source:SWISS;ACC:Q9S834]              | 0    | 16.42 | 14.1                | 2.56E-03 | GO:0004252, GO:0009507, GO:0009532, GO:0009534, GO:0009570, GO:0009579, GO:0009840, GO:0009941 |
| U045842    | 1,034  | -                                                                                                      | 0    | 14.81 | 14.1                | 2.23E-03 | -                                                                                              |
| U060833    | 521    | -                                                                                                      | 0    | 50.03 | 14.1                | 2.23E-03 | -                                                                                              |

| Unigene ID | Length | Description                                                                         | FPKM |       | Log <sub>2</sub> FC | P-value  | Gene ontology                                                                                                                                              |
|------------|--------|-------------------------------------------------------------------------------------|------|-------|---------------------|----------|------------------------------------------------------------------------------------------------------------------------------------------------------------|
|            |        |                                                                                     | NW   | AD    |                     |          |                                                                                                                                                            |
| U070695    | 563    | ADP-ribosylation factor GTPase-activating protein AGD3<br>[Source:SWISS;ACC:Q5W7F2] | 0    | 41.9  | 14.1                | 2.31E-03 | GO:0005829, GO:0005886, GO:0006897, GO:0008060, GO:0008270, GO:0009733, GO:0009965, GO:0010051, GO:0010087, GO:0030140, GO:0032312, GO:0035091, GO:0043547 |
| U077558    | 900    | -                                                                                   | 0    | 17.46 | 14.1                | 2.65E-03 | -                                                                                                                                                          |
| U080814    | 1,620  | -                                                                                   | 0    | 8.09  | 14.1                | 2.31E-03 | -                                                                                                                                                          |
| U091553    | 1,530  | -                                                                                   | 0    | 8.7   | 14.1                | 2.31E-03 | -                                                                                                                                                          |
| U098113    | 859    | -                                                                                   | 0    | 18.99 | 14.1                | 2.56E-03 | -                                                                                                                                                          |
| U023800    | 677    | -                                                                                   | 0    | 30.01 | 14.2                | 2.09E-03 | -                                                                                                                                                          |
| U025371    | 793    | AP-2 complex subunit sigma<br>[Source:SWISS;ACC:Q84WL9]                             | 0    | 23.9  | 14.2                | 1.72E-03 | GO:0006897, GO:0008565, GO:0030122                                                                                                                         |
| U026924    | 842    | -                                                                                   | 0    | 21.09 | 14.2                | 1.95E-03 | -                                                                                                                                                          |
| U029820    | 1,733  | Cactin [Source:SWISS;ACC:F4I2J8]                                                    | 0    | 7.58  | 14.2                | 2.16E-03 | GO:0005681, GO:0006397, GO:0008380, GO:0016607                                                                                                             |
| U030433    | 844    | -                                                                                   | 0    | 21.29 | 14.2                | 1.83E-03 | -                                                                                                                                                          |
| U031849    | 1,273  | F-box/kelch-repeat protein At3g18720<br>[Source:SWISS;ACC:Q9LSA5]                   | 0    | 11.4  | 14.2                | 2.02E-03 | -                                                                                                                                                          |

| Unigene ID | Length | Description                                                                         | FPKM |       | Log <sub>2</sub> FC | P-value  | Gene ontology                                                                                                                                                                                                                                                                                                                                  |
|------------|--------|-------------------------------------------------------------------------------------|------|-------|---------------------|----------|------------------------------------------------------------------------------------------------------------------------------------------------------------------------------------------------------------------------------------------------------------------------------------------------------------------------------------------------|
|            |        |                                                                                     | NW   | AD    |                     |          |                                                                                                                                                                                                                                                                                                                                                |
| U044783    | 2,201  | Histidine kinase 2<br>[Source:SWISS;ACC:Q9C5U2]                                     | 0    | 6.04  | 14.2                | 1.72E-03 | GO:0000155, GO:0004673, GO:0005034, GO:0005789, GO:0005886, GO:0006970, GO:0007275, GO:0009414, GO:0009636, GO:0009651, GO:0009736, GO:0009737, GO:0009884, GO:0009909, GO:0010029, GO:0010087, GO:0010271, GO:0016021, GO:0018106, GO:0019900, GO:0034757, GO:0042802, GO:0043424, GO:0048509, GO:0048831, GO:0070417, GO:0071215, GO:0080117 |
| U061786    | 837    | -                                                                                   | 0    | 21.58 | 14.2                | 1.83E-03 | -                                                                                                                                                                                                                                                                                                                                              |
| U061890    | 588    | -                                                                                   | 0    | 40.38 | 14.2                | 1.89E-03 | -                                                                                                                                                                                                                                                                                                                                              |
| U086415    | 535    | -                                                                                   | 0    | 48.02 | 14.2                | 2.09E-03 | -                                                                                                                                                                                                                                                                                                                                              |
| U011966    | 598    | -                                                                                   | 0    | 41.36 | 14.3                | 1.51E-03 | -                                                                                                                                                                                                                                                                                                                                              |
| U012737    | 2,905  | -                                                                                   | 0    | 4.59  | 14.3                | 1.47E-03 | -                                                                                                                                                                                                                                                                                                                                              |
| U017581    | 661    | -                                                                                   | 0    | 33.26 | 14.3                | 1.66E-03 | -                                                                                                                                                                                                                                                                                                                                              |
| U029568    | 974    | 26S proteasome non-ATPase regulatory subunit 4 homolog<br>[Source:SWISS;ACC:P55034] | 0    | 17.66 | 14.3                | 1.61E-03 | GO:0000502, GO:0001653, GO:0005634, GO:0005829, GO:0006974, GO:0007165, GO:0008540, GO:0009408, GO:0009555, GO:0009651, GO:0009733, GO:0009735, GO:0009737, GO:0009744, GO:0010029, GO:0010150, GO:0016020, GO:0030163, GO:0031593, GO:0043161, GO:0043248, GO:0048366, GO:0048455, GO:0048528, GO:0048767, GO:0051788                         |

| Unigene ID | Length | Description                                                                                                | FPKM |       | Log <sub>2</sub> FC | P-value  | Gene ontology                                                                                                    |
|------------|--------|------------------------------------------------------------------------------------------------------------|------|-------|---------------------|----------|------------------------------------------------------------------------------------------------------------------|
|            |        |                                                                                                            | NW   | AD    |                     |          |                                                                                                                  |
| U033899    | 1,016  | -                                                                                                          | 0    | 17    | 14.3                | 1.47E-03 | -                                                                                                                |
| U041669    | 672    | -                                                                                                          | 0    | 33.06 | 14.3                | 1.51E-03 | -                                                                                                                |
| U049134    | 574    | Non-specific lipid-transfer protein<br>[Source:SWISS;ACC:P27631]                                           | 0    | 44.15 | 14.3                | 1.61E-03 | GO:0006869, GO:0008289                                                                                           |
| U053456    | 1,619  | Probable mitochondrial chaperone bcs1<br>[Source:SWISS;ACC:Q9P6Q3]                                         | 0    | 9.3   | 14.3                | 1.38E-03 | GO:0005524, GO:0005739, GO:0005743,<br>GO:0006200, GO:0016021, GO:0016226,<br>GO:0034551, GO:0042623, GO:0043623 |
| U096455    | 594    | -                                                                                                          | 0    | 43.01 | 14.3                | 1.38E-03 | -                                                                                                                |
| U099152    | 630    | -                                                                                                          | 0    | 38.54 | 14.3                | 1.34E-03 | -                                                                                                                |
| U002037    | 534    | -                                                                                                          | 0    | 55.83 | 14.4                | 1.19E-03 | -                                                                                                                |
| U014544    | 1,610  | G-type lectin S-receptor-like<br>serine/threonine-protein kinase<br>At1g34300<br>[Source:SWISS;ACC:Q9XID3] | 0    | 9.57  | 14.4                | 1.26E-03 | GO:0004674, GO:0005516, GO:0005524,<br>GO:0005886, GO:0016021, GO:0030246,<br>GO:0048544                         |
| U015311    | 847    | -                                                                                                          | 0    | 24.08 | 14.4                | 1.13E-03 | -                                                                                                                |
| U022765    | 1,424  | Wall-associated receptor kinase-like 9<br>[Source:SWISS;ACC:Q9C9L5]                                        | 0    | 11.06 | 14.4                | 1.30E-03 | GO:0004674, GO:0005509, GO:0005524,<br>GO:0016021, GO:0030247                                                    |
| U029170    | 871    | -                                                                                                          | 0    | 23.52 | 14.4                | 1.03E-03 | -                                                                                                                |

| Unigene ID | Length | Description                                                                     | FPKM |       | Log <sub>2</sub> FC | P-value  | Gene ontology                      |
|------------|--------|---------------------------------------------------------------------------------|------|-------|---------------------|----------|------------------------------------|
|            |        |                                                                                 | NW   | AD    |                     |          |                                    |
| U038570    | 912    | Putative receptor-like protein kinase<br>At5g39000<br>[Source:SWISS;ACC:Q9FID8] | 0    | 20.78 | 14.4                | 1.26E-03 | GO:0004674, GO:0005524, GO:0016021 |
| U040558    | 1,706  | -                                                                               | 0    | 9.03  | 14.4                | 1.19E-03 | -                                  |
| U077901    | 520    | -                                                                               | 0    | 58.6  | 14.4                | 1.23E-03 | -                                  |
| U006244    | 1,241  | Putative ribonuclease H protein<br>At1g65750<br>[Source:SWISS;ACC:P0C2F6]       | 0    | 14.2  | 14.5                | 1.01E-03 | GO:0003676, GO:0004523, GO:0046872 |
| U010190    | 2,536  | -                                                                               | 0    | 6.08  | 14.5                | 9.03E-04 | -                                  |
| U014741    | 992    | -                                                                               | 0    | 20.01 | 14.5                | 9.03E-04 | -                                  |
| U016571    | 919    | -                                                                               | 0    | 22.91 | 14.5                | 8.35E-04 | -                                  |
| U016944    | 586    | -                                                                               | 0    | 49.09 | 14.5                | 9.28E-04 | -                                  |
| U018202    | 602    | -                                                                               | 0    | 48.34 | 14.5                | 7.92E-04 | -                                  |
| U019351    | 1,233  | -                                                                               | 0    | 14.64 | 14.5                | 9.28E-04 | -                                  |
| U034030    | 602    | -                                                                               | 0    | 46.6  | 14.5                | 9.03E-04 | -                                  |
| U055694    | 1,647  | -                                                                               | 0    | 10.24 | 14.5                | 8.80E-04 | -                                  |

| Unigene ID | Length | Description                                                                        | FPKM |       | Log <sub>2</sub> FC | P-value  | Gene ontology                                                                                              |
|------------|--------|------------------------------------------------------------------------------------|------|-------|---------------------|----------|------------------------------------------------------------------------------------------------------------|
|            |        |                                                                                    | NW   | AD    |                     |          |                                                                                                            |
| U084616    | 1,540  | -                                                                                  | 0    | 11.34 | 14.5                | 8.13E-04 | -                                                                                                          |
| U002823    | 2,858  | -                                                                                  | 0    | 5.91  | 14.6                | 6.03E-04 | -                                                                                                          |
| U009339    | 2,724  | -                                                                                  | 0    | 5.88  | 14.6                | 7.53E-04 | -                                                                                                          |
| U010753    | 4,602  | -                                                                                  | 0    | 3.39  | 14.6                | 6.81E-04 | -                                                                                                          |
| U014953    | 1,032  | Pentatricopeptide repeat-containing protein At1g63150<br>[Source:SWISS;ACC:Q9CAM8] | 0    | 20.35 | 14.6                | 6.81E-04 | -                                                                                                          |
| U031368    | 792    | -                                                                                  | 0    | 30.12 | 14.6                | 7.34E-04 | -                                                                                                          |
| U040560    | 3,289  | -                                                                                  | 0    | 4.97  | 14.6                | 6.32E-04 | -                                                                                                          |
| U052990    | 1,600  | Probable inactive receptor kinase At5g10020<br>[Source:SWISS;ACC:Q0WR59]           | 0    | 11.73 | 14.6                | 6.03E-04 | GO:0004672, GO:0005524, GO:0005829, GO:0005886, GO:0016021                                                 |
| U061803    | 500    | -                                                                                  | 0    | 74.59 | 14.6                | 6.98E-04 | -                                                                                                          |
| U007659    | 1,658  | -                                                                                  | 0    | 11.48 | 14.7                | 5.48E-04 | -                                                                                                          |
| U011380    | 890    | -                                                                                  | 0    | 28.05 | 14.7                | 4.66E-04 | -                                                                                                          |
| U015169    | 753    | Fatty-acid-binding protein 1<br>[Source:SWISS;ACC:Q9M1X2]                          | 0    | 35.3  | 14.7                | 5.48E-04 | GO:0005504, GO:0005739, GO:0006631, GO:0009507, GO:0009536, GO:0009570, GO:0009813, GO:0009941, GO:0045430 |

| Unigene ID | Length | Description                                                                            | FPKM |       | Log <sub>2</sub> FC | P-value  | Gene ontology                                  |
|------------|--------|----------------------------------------------------------------------------------------|------|-------|---------------------|----------|------------------------------------------------|
|            |        |                                                                                        | NW   | AD    |                     |          |                                                |
| U029381    | 888    | Membrane-anchored ubiquitin-fold protein 4<br>[Source:SWISS;ACC:Q9LSD8]                | 0    | 27.1  | 14.7                | 5.35E-04 | GO:0005886                                     |
| U029383    | 888    | Membrane-anchored ubiquitin-fold protein 4<br>[Source:SWISS;ACC:Q9LSD8]                | 0    | 27.1  | 14.7                | 5.35E-04 | GO:0005886                                     |
| U040564    | 2,937  | -                                                                                      | 0    | 5.91  | 14.7                | 5.35E-04 | -                                              |
| U002420    | 760    | -                                                                                      | 0    | 37.97 | 14.8                | 3.90E-04 | -                                              |
| U005679    | 553    | -                                                                                      | 0    | 69.82 | 14.8                | 3.82E-04 | -                                              |
| U010617    | 1,023  | Putative F-box/LRR-repeat protein 23<br>[Source:SWISS;ACC:Q9S9V9]                      | 0    | 24.16 | 14.8                | 3.73E-04 | -                                              |
| U010731    | 727    | -                                                                                      | 0    | 40.63 | 14.8                | 4.07E-04 | -                                              |
| U010822    | 3,536  | -                                                                                      | 0    | 5.28  | 14.8                | 3.73E-04 | -                                              |
| U015824    | 964    | -                                                                                      | 0    | 26.02 | 14.8                | 3.90E-04 | -                                              |
| U015835    | 526    | -                                                                                      | 0    | 78.71 | 14.8                | 3.65E-04 | -                                              |
| U015958    | 1,313  | 3-oxoacyl-[acyl-carrier-protein] reductase, chloroplastic<br>[Source:SWISS;ACC:P28643] | 0    | 17.03 | 14.8                | 3.82E-04 | GO:0004316, GO:0006633, GO:0009507, GO:0051287 |

| Unigene ID | Length | Description                                                                                 | FPKM |       | Log <sub>2</sub> FC | P-value  | Gene ontology                                                                                                    |
|------------|--------|---------------------------------------------------------------------------------------------|------|-------|---------------------|----------|------------------------------------------------------------------------------------------------------------------|
|            |        |                                                                                             | NW   | AD    |                     |          |                                                                                                                  |
| U017511    | 559    | -                                                                                           | 0    | 66.83 | 14.8                | 4.17E-04 | -                                                                                                                |
| U017582    | 610    | -                                                                                           | 0    | 55.79 | 14.8                | 4.17E-04 | -                                                                                                                |
| U021470    | 1,186  | Acyl-CoA--sterol O-acyltransferase 1<br>[Source:SWISS;ACC:Q9SV07]                           | 0    | 18.6  | 14.8                | 4.55E-04 | GO:0016021, GO:0016127, GO:0016746,<br>GO:0034434                                                                |
| U031059    | 826    | -                                                                                           | 0    | 33.26 | 14.8                | 3.82E-04 | -                                                                                                                |
| U052350    | 2,524  | Arginine--tRNA ligase<br>{ECO:0000255}HAMAP-<br>Rule:MF_00123}<br>[Source:SWISS;ACC:Q82E68] | 0    | 7.5   | 14.8                | 4.17E-04 | GO:0004814, GO:0005524, GO:0005737,<br>GO:0006420                                                                |
| U087382    | 636    | -                                                                                           | 0    | 51.95 | 14.8                | 3.99E-04 | -                                                                                                                |
| U017584    | 550    | -                                                                                           | 0    | 74.18 | 14.9                | 3.15E-04 | -                                                                                                                |
| U002273    | 639    | -                                                                                           | 0    | 60.36 | 15                  | 2.14E-04 | -                                                                                                                |
| U013642    | 522    | -                                                                                           | 0    | 89.4  | 15                  | 2.36E-04 | -                                                                                                                |
| U014752    | 2,477  | Zinc finger CCCH domain-containing<br>protein 19<br>[Source:SWISS;ACC:Q9SIV5]               | 0    | 8.64  | 15                  | 2.56E-04 | GO:0003677, GO:0005634, GO:0006352,<br>GO:0008270, GO:0010964, GO:0016570,<br>GO:0031047, GO:0032776, GO:0042393 |
| U017291    | 4,310  | -                                                                                           | 0    | 4.71  | 15                  | 2.51E-04 | -                                                                                                                |



| Unigene ID | Length | Description                                                                      | FPKM |        | Log <sub>2</sub> FC | P-value  | Gene ontology                      |
|------------|--------|----------------------------------------------------------------------------------|------|--------|---------------------|----------|------------------------------------|
|            |        |                                                                                  | NW   | AD     |                     |          |                                    |
| U035832    | 1,717  | Uncharacterized acetyltransferase<br>At3g50280<br>[Source:SWISS;ACC:Q9SND9]      | 0    | 13.35  | 15                  | 2.56E-04 | GO:0016747                         |
| U078454    | 661    | -                                                                                | 0    | 54.5   | 15                  | 2.51E-04 | -                                  |
| U082491    | 816    | -                                                                                | 0    | 37.55  | 15                  | 2.56E-04 | -                                  |
| U000060    | 854    | -                                                                                | 0    | 37.71  | 15.1                | 1.87E-04 | -                                  |
| U010762    | 1,663  | -                                                                                | 0    | 14.89  | 15.1                | 1.95E-04 | -                                  |
| U017814    | 668    | -                                                                                | 0    | 57     | 15.1                | 1.95E-04 | -                                  |
| U037715    | 1,399  | -                                                                                | 0    | 19.15  | 15.1                | 1.70E-04 | -                                  |
| U059276    | 526    | Flavin-containing monooxygenase<br>FMO GS-OX-like 3<br>[Source:SWISS;ACC:Q9SXD5] | 0    | 93.14  | 15.1                | 1.87E-04 | GO:0004499, GO:0050660, GO:0050661 |
| U061030    | 1,250  | -                                                                                | 0    | 22.47  | 15.1                | 1.61E-04 | -                                  |
| U085078    | 505    | -                                                                                | 0    | 106.15 | 15.1                | 1.61E-04 | -                                  |
| U090022    | 831    | -                                                                                | 0    | 41.06  | 15.1                | 1.58E-04 | -                                  |
| U008503    | 514    | -                                                                                | 0    | 104.55 | 15.2                | 1.45E-04 | -                                  |

| Unigene ID | Length | Description                                                                           | FPKM |       | Log <sub>2</sub> FC | P-value  | Gene ontology                                                                                                                                              |
|------------|--------|---------------------------------------------------------------------------------------|------|-------|---------------------|----------|------------------------------------------------------------------------------------------------------------------------------------------------------------|
|            |        |                                                                                       | NW   | AD    |                     |          |                                                                                                                                                            |
| U035098    | 592    | -                                                                                     | 0    | 81.08 | 15.2                | 1.19E-04 | -                                                                                                                                                          |
| U050922    | 1,918  | NEDD8-activating enzyme E1 regulatory subunit {ECO:0000305} [Source:SWISS;ACC:P42744] | 0    | 13.34 | 15.2                | 1.50E-04 | GO:0000166, GO:0003824, GO:0005634, GO:0005829, GO:0006281, GO:0007131, GO:0009414, GO:0009734, GO:0009735, GO:0009965, GO:0010252, GO:0016567, GO:0045116 |
| U000654    | 2,327  | -                                                                                     | 0    | 11.39 | 15.3                | 1.13E-04 | -                                                                                                                                                          |
| U019372    | 2,858  | -                                                                                     | 0    | 9.13  | 15.3                | 1.07E-04 | -                                                                                                                                                          |
| U040121    | 1,365  | Cationic amino acid transporter 9, chloroplastic [Source:SWISS;ACC:Q9C5D6]            | 0    | 22.31 | 15.3                | 1.04E-04 | GO:0005774, GO:0015171, GO:0016021, GO:0031969                                                                                                             |
| U051888    | 728    | -                                                                                     | 0    | 57.75 | 15.3                | 9.70E-05 | -                                                                                                                                                          |
| U007660    | 2,728  | -                                                                                     | 0    | 10.48 | 15.4                | 7.49E-05 | -                                                                                                                                                          |
| U014568    | 983    | -                                                                                     | 0    | 37.96 | 15.4                | 7.49E-05 | -                                                                                                                                                          |
| U019134    | 4,591  | -                                                                                     | 0    | 5.75  | 15.4                | 8.37E-05 | -                                                                                                                                                          |
| U026362    | 1,099  | -                                                                                     | 0    | 33.07 | 15.4                | 6.82E-05 | -                                                                                                                                                          |
| U079954    | 774    | -                                                                                     | 0    | 55.11 | 15.4                | 7.61E-05 | -                                                                                                                                                          |
| U022834    | 1,067  | -                                                                                     | 0    | 36.09 | 15.5                | 5.60E-05 | -                                                                                                                                                          |

| Unigene ID | Length | Description                                                           | FPKM |        | Log <sub>2</sub> FC | P-value  | Gene ontology                                                                                                                                                                                                 |
|------------|--------|-----------------------------------------------------------------------|------|--------|---------------------|----------|---------------------------------------------------------------------------------------------------------------------------------------------------------------------------------------------------------------|
|            |        |                                                                       | NW   | AD     |                     |          |                                                                                                                                                                                                               |
| U047287    | 545    | -                                                                     | 0    | 112.87 | 15.5                | 6.12E-05 | -                                                                                                                                                                                                             |
| U013183    | 2,473  | -                                                                     | 0    | 13.61  | 15.6                | 3.97E-05 | -                                                                                                                                                                                                             |
| U019371    | 2,608  | -                                                                     | 0    | 12.96  | 15.6                | 3.76E-05 | -                                                                                                                                                                                                             |
| U102955    | 544    | -                                                                     | 0    | 131.6  | 15.7                | 3.24E-05 | -                                                                                                                                                                                                             |
| U011899    | 4,371  | -                                                                     | 0    | 8.36   | 15.8                | 2.14E-05 | -                                                                                                                                                                                                             |
| U025260    | 950    | -                                                                     | 0    | 54.19  | 15.8                | 2.04E-05 | -                                                                                                                                                                                                             |
| U001046    | 808    | -                                                                     | 0    | 73.53  | 15.9                | 1.63E-05 | -                                                                                                                                                                                                             |
| U040557    | 5,011  | -                                                                     | 0    | 7.63   | 15.9                | 1.69E-05 | -                                                                                                                                                                                                             |
| U019170    | 5,234  | -                                                                     | 0    | 7.92   | 16                  | 1.17E-05 | -                                                                                                                                                                                                             |
| U051036    | 2,297  | DNA topoisomerase 2<br>[Source:SWISS;ACC:P30182]                      | 0    | 18.83  | 16                  | 1.41E-05 | GO:0000712, GO:0000795, GO:0000819,<br>GO:0003677, GO:0003916, GO:0003918,<br>GO:0005524, GO:0005634, GO:0006200,<br>GO:0006261, GO:0006265, GO:0006312,<br>GO:0008094, GO:0009330, GO:0044774,<br>GO:0046872 |
| U056819    | 4,211  | -                                                                     | 0    | 10.12  | 16                  | 1.11E-05 | -                                                                                                                                                                                                             |
| U016865    | 1,798  | Histone-lysine N-methyltransferase<br>ATXR2 [Source:SWISS;ACC:Q5PP37] | 0    | 27.82  | 16.1                | 9.19E-06 | GO:0005634, GO:0018024, GO:0046872                                                                                                                                                                            |

| Unigene ID | Length | Description                                                                                 | FPKM |        | Log <sub>2</sub> FC | P-value  | Gene ontology                                                             |
|------------|--------|---------------------------------------------------------------------------------------------|------|--------|---------------------|----------|---------------------------------------------------------------------------|
|            |        |                                                                                             | NW   | AD     |                     |          |                                                                           |
| U035806    | 1,214  | Albumin-2<br>[Source:SWISS;ACC:P08688]                                                      | 0    | 47.26  | 16.1                | 8.16E-06 | GO:0005509, GO:0005829, GO:0045735                                        |
| U064454    | 503    | -                                                                                           | 0    | 213.89 | 16.1                | 8.49E-06 | -                                                                         |
| U086794    | 550    | -                                                                                           | 0    | 166.61 | 16.1                | 1.06E-05 | -                                                                         |
| U007933    | 1,175  | -                                                                                           | 0    | 51.66  | 16.2                | 6.76E-06 | -                                                                         |
| U093739    | 905    | -                                                                                           | 0    | 73.14  | 16.2                | 7.71E-06 | -                                                                         |
| U023862    | 3,294  | -                                                                                           | 0    | 16.01  | 16.3                | 4.90E-06 | -                                                                         |
| U033385    | 1,205  | Rop guanine nucleotide exchange factor 1<br>[Source:SWISS;ACC:Q93ZY2]                       | 0    | 53.7   | 16.3                | 4.90E-06 | GO:0005089, GO:0005829, GO:0009860,<br>GO:0016324, GO:0032321, GO:0080092 |
| U012313    | 618    | -                                                                                           | 0    | 161.9  | 16.4                | 4.29E-06 | -                                                                         |
| U034170    | 996    | -                                                                                           | 0    | 74.61  | 16.4                | 3.79E-06 | -                                                                         |
| U031348    | 667    | -                                                                                           | 0    | 168.96 | 16.6                | 1.93E-06 | -                                                                         |
| U050100    | 2,537  | Arginine--tRNA ligase<br>{ECO:0000255 HAMAP-<br>Rule:MF_00123}<br>[Source:SWISS;ACC:B7KCT7] | 0    | 26.48  | 16.6                | 2.01E-06 | GO:0004814, GO:0005524, GO:0005737,<br>GO:0006420                         |
| U092211    | 643    | -                                                                                           | 0    | 182.71 | 16.6                | 1.86E-06 | -                                                                         |

| Unigene ID | Length | Description                                                       | FPKM |        | Log <sub>2</sub> FC | P-value  | Gene ontology                                                                                                                                                                                                 |
|------------|--------|-------------------------------------------------------------------|------|--------|---------------------|----------|---------------------------------------------------------------------------------------------------------------------------------------------------------------------------------------------------------------|
|            |        |                                                                   | NW   | AD     |                     |          |                                                                                                                                                                                                               |
| U007380    | 5,436  | -                                                                 | 0    | 12.33  | 16.7                | 1.49E-06 | -                                                                                                                                                                                                             |
| U019844    | 5,236  | -                                                                 | 0    | 12.68  | 16.7                | 1.57E-06 | -                                                                                                                                                                                                             |
| U024325    | 7,193  | -                                                                 | 0    | 8.96   | 16.7                | 1.65E-06 | -                                                                                                                                                                                                             |
| U063181    | 652    | -                                                                 | 0    | 181.04 | 16.7                | 1.73E-06 | -                                                                                                                                                                                                             |
| U000069    | 714    | -                                                                 | 0    | 172.45 | 16.8                | 1.06E-06 | -                                                                                                                                                                                                             |
| U015178    | 792    | -                                                                 | 0    | 141.38 | 16.8                | 1.16E-06 | -                                                                                                                                                                                                             |
| U019192    | 1,069  | -                                                                 | 0    | 89.39  | 16.8                | 1.16E-06 | -                                                                                                                                                                                                             |
| U036209    | 1,059  | F-box/kelch-repeat protein At3g06240<br>[Source:SWISS;ACC:Q8GXC7] | 0    | 90.08  | 16.8                | 1.19E-06 | -                                                                                                                                                                                                             |
| U102440    | 713    | -                                                                 | 0    | 181.85 | 16.9                | 8.67E-07 | -                                                                                                                                                                                                             |
| U059347    | 1,196  | -                                                                 | 0    | 97.33  | 17.2                | 4.42E-07 | -                                                                                                                                                                                                             |
| U102706    | 731    | -                                                                 | 0    | 216.23 | 17.2                | 3.69E-07 | -                                                                                                                                                                                                             |
| U051034    | 3,020  | DNA topoisomerase 2<br>[Source:SWISS;ACC:P30182]                  | 0    | 34.28  | 17.3                | 3.24E-07 | GO:0000712, GO:0000795, GO:0000819,<br>GO:0003677, GO:0003916, GO:0003918,<br>GO:0005524, GO:0005634, GO:0006200,<br>GO:0006261, GO:0006265, GO:0006312,<br>GO:0008094, GO:0009330, GO:0044774,<br>GO:0046872 |

| Unigene ID | Length | Description | FPKM |        | Log <sub>2</sub> FC | P-value  | Gene ontology |
|------------|--------|-------------|------|--------|---------------------|----------|---------------|
|            |        |             | NW   | AD     |                     |          |               |
| U100830    | 813    | -           | 0    | 323.74 | 18.1                | 5.29E-08 | -             |
| U013696    | 1,012  | -           | 0    | 258.62 | 18.2                | 3.92E-08 | -             |
| U046194    | 620    | -           | 0    | 610.01 | 18.3                | 3.56E-08 | -             |
| U002510    | 1,103  | -           | 0    | 381.27 | 19                  | 1.48E-08 | -             |

45 **Supplementary Table S4.** Three highest-ranked functional clusters of up-regulated genes determined  
 46 by DAVID gene functional classification tool

| Category or term                              | Functional annotation                   | No. DEGs | Fold enrichment |
|-----------------------------------------------|-----------------------------------------|----------|-----------------|
| Annotation cluster 1 (enrichment score: 1.34) |                                         |          |                 |
| GO:0009055                                    | Electron carrier activity               | 6        | 3.43            |
| IPR017972                                     | Cytochrome P450, conserved site         | 11       | 7.05            |
| IPR002401                                     | Cytochrome P450, E-class, group I       | 11       | 6.96            |
| IPR017973                                     | Cytochrome P450, C-terminal region      | 12       | 6.79            |
| IPR001128                                     | Cytochrome P450                         | 6        | 6.63            |
| SP_PIR_KEYWORDS                               | Iron                                    | 3        | 3.11            |
| PIRSF000045                                   | Cytochrome P450 CYP2D6                  | 5        | 11.21           |
| SP_PIR_KEYWORDS                               | Monooxygenase                           | 5        | 5.74            |
| GO:0005506                                    | Iron ion binding                        | 6        | 2.63            |
| SP_PIR_KEYWORDS                               | Heme                                    | 6        | 4.01            |
| GO:0055114                                    | Oxidation reduction                     | 6        | 1.91            |
| GO:0020037                                    | Heme binding                            | 11       | 3.62            |
| GO:0046906                                    | Tetrapyrrole binding                    | 11       | 3.17            |
| SP_PIR_KEYWORDS                               | Metalloprotein                          | 12       | 4.07            |
| SP_PIR_KEYWORDS                               | Oxidoreductase                          | 6        | 1.47            |
| Annotation cluster 2 (enrichment score: 0.76) |                                         |          |                 |
| GO:0017076                                    | Purine nucleotide binding               | 19       | 1.38            |
| GO:0032555                                    | Purine ribonucleotide binding           | 18       | 1.37            |
| GO:0032553                                    | Ribonucleotide binding                  | 18       | 1.37            |
| SP_PIR_KEYWORDS                               | Nucleotide-binding                      | 16       | 1.41            |
| GO:0030554                                    | Adenyl nucleotide binding               | 17       | 1.35            |
| GO:0001883                                    | Purine nucleoside binding               | 17       | 1.35            |
| GO:0001882                                    | Nucleoside binding                      | 17       | 1.34            |
| GO:0005524                                    | ATP binding                             | 16       | 1.36            |
| GO:0032559                                    | Adenyl ribonucleotide binding           | 16       | 1.34            |
| SP_PIR_KEYWORDS                               | ATP-binding                             | 14       | 1.40            |
| GO:0000166                                    | Nucleotide binding                      | 20       | 1.26            |
| UP_SEQ_FEATURE                                | Nucleotide phosphate-binding region:ATP | 9        | 1.45            |
| Annotation cluster 3 (enrichment score: 0.75) |                                         |          |                 |
| UP_SEQ_FEATURE                                | Repeat:LRR 5                            | 4        | 3.71            |
| UP_SEQ_FEATURE                                | Repeat:LRR 4                            | 4        | 3.21            |
| UP_SEQ_FEATURE                                | Repeat:LRR 3                            | 4        | 2.86            |
| UP_SEQ_FEATURE                                | Repeat:LRR 2                            | 4        | 2.66            |
| UP_SEQ_FEATURE                                | Repeat:LRR 1                            | 3        | 2.66            |
| UP_SEQ_FEATURE                                | Repeat:LRR 6                            | 4        | 3.40            |
| SP_PIR_KEYWORDS                               | Leucine-rich repeat                     | 3        | 2.24            |
| IPR001611                                     | Leucine-rich repeat                     | 4        | 2.39            |

47

48

49 **Supplementary Table S5.** Three highest-ranked functional clusters of down-regulated genes  
 50 determined using the DAVID gene functional classification tool

| Category                                      | Term                                                | No. DEGs | Fold enrichment |
|-----------------------------------------------|-----------------------------------------------------|----------|-----------------|
| Annotation cluster 1 (enrichment score: 1.06) |                                                     |          |                 |
| GO:0009699                                    | Phenylpropanoid biosynthetic process                | 4        | 5.82            |
| GO:0019438                                    | Aromatic compound biosynthetic process              | 5        | 4.02            |
| GO:0009698                                    | Phenylpropanoid metabolic process                   | 4        | 4.25            |
| GO:0042398                                    | Cellular amino acid derivative biosynthetic process | 4        | 3.73            |
| GO:0006575                                    | Cellular amino acid derivative metabolic process    | 4        | 2.35            |
| GO:0019748                                    | Secondary metabolic process                         | 4        | 1.94            |
| Annotation cluster 2 (enrichment score: 0.85) |                                                     |          |                 |
| SM00256                                       | FBOX                                                | 7        | 2.64            |
| UP_SEQ_FEATURE                                | Domain:F-box                                        | 7        | 2.43            |
| IPR001810                                     | Cyclin-like F-box                                   | 7        | 2.26            |
| Annotation cluster 3 (enrichment score: 0.83) |                                                     |          |                 |
| GO:0009735                                    | Response to cytokinin stimulus                      | 6        | 9.10            |
| GO:0009725                                    | Response to hormone stimulus                        | 11       | 2.08            |
| GO:0009719                                    | Response to endogenous stimulus                     | 11       | 1.95            |
| GO:0010033                                    | Response to organic substance                       | 12       | 1.74            |
| GO:0009733                                    | Response to auxin stimulus                          | 6        | 2.93            |
| GO:0009734                                    | Auxin mediated signaling pathway                    | 3        | 4.19            |
| GO:0009755                                    | Hormone-mediated signaling                          | 5        | 2.32            |
| GO:0032870                                    | Cellular response to hormone stimulus               | 5        | 2.24            |
| GO:0007242                                    | Intracellular signaling cascade                     | 6        | 1.49            |
| UP_SEQ_FEATURE                                | Mutagenesis site                                    | 6        | 1.45            |
